# Supplementary material for: Sense of coherence and risk of breast cancer
Source: eLife. 2020 Nov 23;9:e61469. doi: 10.7554/eLife.61469 (PMC7717898; doi:10.7554/eLife.61469)
Supplement: Figure 2—source data 1. [file elife-61469-fig2-data1.xlsx]

## Sheet: Sheet1
_t	hr2	hr2_lci	hr2_uci	hr3	hr3_lci	hr3_uci
6.96235	0.975195	0.715523	1.3291	1.08668	0.795225	1.48496
6.96783	0.975182	0.715441	1.32922	1.08669	0.795146	1.48512
6.96235	0.975195	0.715523	1.3291	1.08668	0.795225	1.48496
5.54962	0.978672	0.738933	1.29619	1.08543	0.817635	1.44094
6.94045	0.975243	0.71585	1.32863	1.08667	0.79554	1.48433
6.96783	0.975182	0.715441	1.32922	1.08669	0.795146	1.48512
6.95688	0.975207	0.715605	1.32899	1.08668	0.795303	1.48481
6.96509	0.975188	0.715482	1.32916	1.08669	0.795185	1.48504
4.88433	0.980677	0.752078	1.27876	1.08463	0.829966	1.41744
4.87885	0.980695	0.752194	1.27861	1.08463	0.830073	1.41724
6.96509	0.975188	0.715482	1.32916	1.08669	0.795185	1.48504
4.91992	0.980561	0.751331	1.27973	1.08468	0.829272	1.41876
4.91992	0.980561	0.751331	1.27973	1.08468	0.829272	1.41876
6.95962	0.975201	0.715564	1.32904	1.08668	0.795264	1.48488
6.95688	0.975207	0.715605	1.32899	1.08668	0.795303	1.48481
4.89802	0.980633	0.75179	1.27913	1.08465	0.829699	1.41795
6.95962	0.975201	0.715564	1.32904	1.08668	0.795264	1.48488
6.95962	0.975201	0.715564	1.32904	1.08668	0.795264	1.48488
6.96783	0.975182	0.715441	1.32922	1.08669	0.795146	1.48512
6.96235	0.975195	0.715523	1.3291	1.08668	0.795225	1.48496
5.39904	0.979098	0.74176	1.29238	1.08527	0.820311	1.43582
6.96509	0.975188	0.715482	1.32916	1.08669	0.795185	1.48504
6.96509	0.975188	0.715482	1.32916	1.08669	0.795185	1.48504
5.47844	0.978872	0.740259	1.2944	1.08536	0.818892	1.43853
5.57974	0.978589	0.738378	1.29695	1.08546	0.817108	1.44195
5.55236	0.978665	0.738883	1.29626	1.08544	0.817587	1.44103
5.42368	0.979028	0.741292	1.29301	1.0853	0.819868	1.43666
6.96509	0.975188	0.715482	1.32916	1.08669	0.795185	1.48504
6.94867	0.975225	0.715727	1.32881	1.08667	0.795422	1.48457
5.54415	0.978687	0.739035	1.29605	1.08543	0.817732	1.44076
4.9473	0.980473	0.750759	1.28047	1.08472	0.828741	1.41976
6.96783	0.975182	0.715441	1.32922	1.08669	0.795146	1.48512
4.81588	0.980903	0.753531	1.27688	1.08454	0.831311	1.4149
5.48118	0.978864	0.740208	1.29447	1.08536	0.818843	1.43863
6.96783	0.975182	0.715441	1.32922	1.08669	0.795146	1.48512
5.52772	0.978733	0.739339	1.29564	1.08541	0.81802	1.4402
4.72827	0.981197	0.755419	1.27446	1.08441	0.833054	1.4116
5.48392	0.978856	0.740156	1.29454	1.08536	0.818795	1.43872
6.96783	0.975182	0.715441	1.32922	1.08669	0.795146	1.48512
5.46475	0.978911	0.740516	1.29405	1.08534	0.819135	1.43807
6.96509	0.975188	0.715482	1.32916	1.08669	0.795185	1.48504
6.96235	0.975195	0.715523	1.3291	1.08668	0.795225	1.48496
6.96509	0.975188	0.715482	1.32916	1.08669	0.795185	1.48504
6.96509	0.975188	0.715482	1.32916	1.08669	0.795185	1.48504
6.96509	0.975188	0.715482	1.32916	1.08669	0.795185	1.48504
6.96509	0.975188	0.715482	1.32916	1.08669	0.795185	1.48504
5.47296	0.978887	0.740362	1.29426	1.08535	0.818989	1.43835
6.96509	0.975188	0.715482	1.32916	1.08669	0.795185	1.48504
4.87611	0.980704	0.752252	1.27854	1.08462	0.830127	1.41714
6.96509	0.975188	0.715482	1.32916	1.08669	0.795185	1.48504
6.96509	0.975188	0.715482	1.32916	1.08669	0.795185	1.48504
6.96509	0.975188	0.715482	1.32916	1.08669	0.795185	1.48504
6.96509	0.975188	0.715482	1.32916	1.08669	0.795185	1.48504
6.95688	0.975207	0.715605	1.32899	1.08668	0.795303	1.48481
4.82957	0.980857	0.753239	1.27726	1.08456	0.831041	1.41541
6.96509	0.975188	0.715482	1.32916	1.08669	0.795185	1.48504
6.96509	0.975188	0.715482	1.32916	1.08669	0.795185	1.48504
6.96509	0.975188	0.715482	1.32916	1.08669	0.795185	1.48504
6.96509	0.975188	0.715482	1.32916	1.08669	0.795185	1.48504
2.16016	0.995044	0.824339	1.2011	1.07633	0.889439	1.3025
6.96235	0.975195	0.715523	1.3291	1.08668	0.795225	1.48496
6.96235	0.975195	0.715523	1.3291	1.08668	0.795225	1.48496
6.96235	0.975195	0.715523	1.3291	1.08668	0.795225	1.48496
4.87885	0.980695	0.752194	1.27861	1.08463	0.830073	1.41724
6.96235	0.975195	0.715523	1.3291	1.08668	0.795225	1.48496
5.56331	0.978634	0.73868	1.29654	1.08545	0.817395	1.4414
4.87885	0.980695	0.752194	1.27861	1.08463	0.830073	1.41724
5.54415	0.978687	0.739035	1.29605	1.08543	0.817732	1.44076
4.92813	0.980535	0.751159	1.27995	1.08469	0.829113	1.41906
5.45654	0.978934	0.740671	1.29384	1.08534	0.819281	1.43779
6.96783	0.975182	0.715441	1.32922	1.08669	0.795146	1.48512
6.96235	0.975195	0.715523	1.3291	1.08668	0.795225	1.48496
5.46201	0.978918	0.740568	1.29398	1.08534	0.819184	1.43797
5.46749	0.978903	0.740465	1.29412	1.08535	0.819087	1.43816
5.42368	0.979028	0.741292	1.29301	1.0853	0.819868	1.43666
6.96235	0.975195	0.715523	1.3291	1.08668	0.795225	1.48496
4.68446	0.981347	0.756375	1.27323	1.08434	0.833934	1.40994
6.96783	0.975182	0.715441	1.32922	1.08669	0.795146	1.48512
4.86242	0.980749	0.752541	1.27816	1.0846	0.830395	1.41663
6.94867	0.975225	0.715727	1.32881	1.08667	0.795422	1.48457
5.54141	0.978695	0.739085	1.29599	1.08542	0.81778	1.44066
6.95962	0.975201	0.715564	1.32904	1.08668	0.795264	1.48488
6.95688	0.975207	0.715605	1.32899	1.08668	0.795303	1.48481
6.94593	0.975231	0.715768	1.32875	1.08667	0.795461	1.48449
4.83778	0.98083	0.753064	1.27748	1.08457	0.830879	1.41571
6.95962	0.975201	0.715564	1.32904	1.08668	0.795264	1.48488
6.94319	0.975237	0.715809	1.32869	1.08667	0.7955	1.48441
5.46749	0.978903	0.740465	1.29412	1.08535	0.819087	1.43816
2.10541	0.995577	0.825801	1.20026	1.07598	0.890245	1.30048
6.95962	0.975201	0.715564	1.32904	1.08668	0.795264	1.48488
6.95962	0.975201	0.715564	1.32904	1.08668	0.795264	1.48488
4.87064	0.980722	0.752367	1.27839	1.08461	0.830234	1.41693
6.95962	0.975201	0.715564	1.32904	1.08668	0.795264	1.48488
6.96509	0.975188	0.715482	1.32916	1.08669	0.795185	1.48504
6.95688	0.975207	0.715605	1.32899	1.08668	0.795303	1.48481
5.51129	0.978779	0.739645	1.29523	1.08539	0.81831	1.43965
6.95688	0.975207	0.715605	1.32899	1.08668	0.795303	1.48481
6.94593	0.975231	0.715768	1.32875	1.08667	0.795461	1.48449
4.72827	0.981197	0.755419	1.27446	1.08441	0.833054	1.4116
6.95688	0.975207	0.715605	1.32899	1.08668	0.795303	1.48481
6.95688	0.975207	0.715605	1.32899	1.08668	0.795303	1.48481
6.95688	0.975207	0.715605	1.32899	1.08668	0.795303	1.48481
6.95688	0.975207	0.715605	1.32899	1.08668	0.795303	1.48481
5.55236	0.978665	0.738883	1.29626	1.08544	0.817587	1.44103
6.95688	0.975207	0.715605	1.32899	1.08668	0.795303	1.48481
4.88706	0.980668	0.752021	1.27883	1.08464	0.829913	1.41754
6.94867	0.975225	0.715727	1.32881	1.08667	0.795422	1.48457
6.95688	0.975207	0.715605	1.32899	1.08668	0.795303	1.48481
5.577	0.978596	0.738428	1.29688	1.08546	0.817156	1.44186
5.51951	0.978756	0.739492	1.29544	1.0854	0.818165	1.43993
6.95688	0.975207	0.715605	1.32899	1.08668	0.795303	1.48481
6.96783	0.975182	0.715441	1.32922	1.08669	0.795146	1.48512
4.87337	0.980713	0.752309	1.27846	1.08462	0.83018	1.41704
6.95688	0.975207	0.715605	1.32899	1.08668	0.795303	1.48481
6.95688	0.975207	0.715605	1.32899	1.08668	0.795303	1.48481
6.95688	0.975207	0.715605	1.32899	1.08668	0.795303	1.48481
6.94593	0.975231	0.715768	1.32875	1.08667	0.795461	1.48449
6.96509	0.975188	0.715482	1.32916	1.08669	0.795185	1.48504
4.86242	0.980749	0.752541	1.27816	1.0846	0.830395	1.41663
6.96783	0.975182	0.715441	1.32922	1.08669	0.795146	1.48512
6.95688	0.975207	0.715605	1.32899	1.08668	0.795303	1.48481
4.86516	0.98074	0.752483	1.27824	1.08461	0.830341	1.41673
4.87337	0.980713	0.752309	1.27846	1.08462	0.83018	1.41704
4.81588	0.980903	0.753531	1.27688	1.08454	0.831311	1.4149
6.96783	0.975182	0.715441	1.32922	1.08669	0.795146	1.48512
6.96783	0.975182	0.715441	1.32922	1.08669	0.795146	1.48512
6.96783	0.975182	0.715441	1.32922	1.08669	0.795146	1.48512
6.96783	0.975182	0.715441	1.32922	1.08669	0.795146	1.48512
4.87611	0.980704	0.752252	1.27854	1.08462	0.830127	1.41714
5.81246	0.977961	0.734185	1.30268	1.08569	0.813117	1.44963
6.96783	0.975182	0.715441	1.32922	1.08669	0.795146	1.48512
6.96783	0.975182	0.715441	1.32922	1.08669	0.795146	1.48512
6.96509	0.975188	0.715482	1.32916	1.08669	0.795185	1.48504
6.96509	0.975188	0.715482	1.32916	1.08669	0.795185	1.48504
4.87885	0.980695	0.752194	1.27861	1.08463	0.830073	1.41724
6.96509	0.975188	0.715482	1.32916	1.08669	0.795185	1.48504
6.96509	0.975188	0.715482	1.32916	1.08669	0.795185	1.48504
6.96509	0.975188	0.715482	1.32916	1.08669	0.795185	1.48504
6.95962	0.975201	0.715564	1.32904	1.08668	0.795264	1.48488
4.93087	0.980526	0.751102	1.28003	1.0847	0.82906	1.41916
6.96509	0.975188	0.715482	1.32916	1.08669	0.795185	1.48504
6.96509	0.975188	0.715482	1.32916	1.08669	0.795185	1.48504
4.91992	0.980561	0.751331	1.27973	1.08468	0.829272	1.41876
6.96509	0.975188	0.715482	1.32916	1.08669	0.795185	1.48504
6.96509	0.975188	0.715482	1.32916	1.08669	0.795185	1.48504
6.96509	0.975188	0.715482	1.32916	1.08669	0.795185	1.48504
6.96509	0.975188	0.715482	1.32916	1.08669	0.795185	1.48504
5.47023	0.978895	0.740413	1.29419	1.08535	0.819038	1.43825
5.46749	0.978903	0.740465	1.29412	1.08535	0.819087	1.43816
6.96235	0.975195	0.715523	1.3291	1.08668	0.795225	1.48496
6.94593	0.975231	0.715768	1.32875	1.08667	0.795461	1.48449
6.94867	0.975225	0.715727	1.32881	1.08667	0.795422	1.48457
6.96783	0.975182	0.715441	1.32922	1.08669	0.795146	1.48512
4.88706	0.980668	0.752021	1.27883	1.08464	0.829913	1.41754
5.56879	0.978619	0.738579	1.29667	1.08545	0.8173	1.44158
6.96235	0.975195	0.715523	1.3291	1.08668	0.795225	1.48496
5.53046	0.978726	0.739288	1.29571	1.08541	0.817972	1.44029
6.95962	0.975201	0.715564	1.32904	1.08668	0.795264	1.48488
6.96235	0.975195	0.715523	1.3291	1.08668	0.795225	1.48496
6.96235	0.975195	0.715523	1.3291	1.08668	0.795225	1.48496
4.83778	0.98083	0.753064	1.27748	1.08457	0.830879	1.41571
6.95962	0.975201	0.715564	1.32904	1.08668	0.795264	1.48488
6.95962	0.975201	0.715564	1.32904	1.08668	0.795264	1.48488
1.20192	1.00652	0.830648	1.21964	1.06963	0.880955	1.29872
6.95962	0.975201	0.715564	1.32904	1.08668	0.795264	1.48488
5.24572	0.979548	0.744725	1.28842	1.0851	0.823103	1.43049
5.54141	0.978695	0.739085	1.29599	1.08542	0.81778	1.44066
6.95962	0.975201	0.715564	1.32904	1.08668	0.795264	1.48488
6.94319	0.975237	0.715809	1.32869	1.08667	0.7955	1.48441
6.95962	0.975201	0.715564	1.32904	1.08668	0.795264	1.48488
6.95962	0.975201	0.715564	1.32904	1.08668	0.795264	1.48488
4.74196	0.981151	0.755122	1.27484	1.08443	0.83278	1.41212
6.94867	0.975225	0.715727	1.32881	1.08667	0.795422	1.48457
6.95962	0.975201	0.715564	1.32904	1.08668	0.795264	1.48488
6.95962	0.975201	0.715564	1.32904	1.08668	0.795264	1.48488
4.92266	0.980553	0.751273	1.27981	1.08469	0.829219	1.41886
5.53867	0.978703	0.739136	1.29592	1.08542	0.817828	1.44057
6.96783	0.975182	0.715441	1.32922	1.08669	0.795146	1.48512
6.95688	0.975207	0.715605	1.32899	1.08668	0.795303	1.48481
5.65366	0.978386	0.737028	1.29878	1.08554	0.815825	1.44441
6.94319	0.975237	0.715809	1.32869	1.08667	0.7955	1.48441
6.53525	0.976164	0.722088	1.31964	1.08633	0.801541	1.47232
4.85969	0.980758	0.752599	1.27809	1.0846	0.830449	1.41653
6.96235	0.975195	0.715523	1.3291	1.08668	0.795225	1.48496
6.96509	0.975188	0.715482	1.32916	1.08669	0.795185	1.48504
5.577	0.978596	0.738428	1.29688	1.08546	0.817156	1.44186
6.96783	0.975182	0.715441	1.32922	1.08669	0.795146	1.48512
6.96783	0.975182	0.715441	1.32922	1.08669	0.795146	1.48512
6.94319	0.975237	0.715809	1.32869	1.08667	0.7955	1.48441
6.96783	0.975182	0.715441	1.32922	1.08669	0.795146	1.48512
6.96235	0.975195	0.715523	1.3291	1.08668	0.795225	1.48496
6.96235	0.975195	0.715523	1.3291	1.08668	0.795225	1.48496
6.95962	0.975201	0.715564	1.32904	1.08668	0.795264	1.48488
6.96783	0.975182	0.715441	1.32922	1.08669	0.795146	1.48512
6.96235	0.975195	0.715523	1.3291	1.08668	0.795225	1.48496
6.95962	0.975201	0.715564	1.32904	1.08668	0.795264	1.48488
6.95962	0.975201	0.715564	1.32904	1.08668	0.795264	1.48488
6.95688	0.975207	0.715605	1.32899	1.08668	0.795303	1.48481
6.95688	0.975207	0.715605	1.32899	1.08668	0.795303	1.48481
2.13826	0.995256	0.824933	1.20074	1.07619	0.889773	1.30167
6.95688	0.975207	0.715605	1.32899	1.08668	0.795303	1.48481
6.96783	0.975182	0.715441	1.32922	1.08669	0.795146	1.48512
6.96509	0.975188	0.715482	1.32916	1.08669	0.795185	1.48504
4.57495	0.981728	0.758802	1.27015	1.08417	0.836161	1.40573
6.96783	0.975182	0.715441	1.32922	1.08669	0.795146	1.48512
6.94045	0.975243	0.71585	1.32863	1.08667	0.79554	1.48433
4.89528	0.980641	0.751848	1.27906	1.08465	0.829752	1.41785
6.96235	0.975195	0.715523	1.3291	1.08668	0.795225	1.48496
6.95962	0.975201	0.715564	1.32904	1.08668	0.795264	1.48488
5.46475	0.978911	0.740516	1.29405	1.08534	0.819135	1.43807
6.95688	0.975207	0.715605	1.32899	1.08668	0.795303	1.48481
6.95688	0.975207	0.715605	1.32899	1.08668	0.795303	1.48481
6.96509	0.975188	0.715482	1.32916	1.08669	0.795185	1.48504
6.95688	0.975207	0.715605	1.32899	1.08668	0.795303	1.48481
6.96235	0.975195	0.715523	1.3291	1.08668	0.795225	1.48496
6.96235	0.975195	0.715523	1.3291	1.08668	0.795225	1.48496
6.96235	0.975195	0.715523	1.3291	1.08668	0.795225	1.48496
6.96509	0.975188	0.715482	1.32916	1.08669	0.795185	1.48504
6.96783	0.975182	0.715441	1.32922	1.08669	0.795146	1.48512
6.96509	0.975188	0.715482	1.32916	1.08669	0.795185	1.48504
6.96783	0.975182	0.715441	1.32922	1.08669	0.795146	1.48512
5.48939	0.978841	0.740054	1.29468	1.08537	0.818698	1.43891
6.96235	0.975195	0.715523	1.3291	1.08668	0.795225	1.48496
6.96783	0.975182	0.715441	1.32922	1.08669	0.795146	1.48512
6.96783	0.975182	0.715441	1.32922	1.08669	0.795146	1.48512
6.96783	0.975182	0.715441	1.32922	1.08669	0.795146	1.48512
5.54962	0.978672	0.738933	1.29619	1.08543	0.817635	1.44094
5.54141	0.978695	0.739085	1.29599	1.08542	0.81778	1.44066
5.51951	0.978756	0.739492	1.29544	1.0854	0.818165	1.43993
4.84873	0.980794	0.752831	1.27779	1.08458	0.830664	1.41612
6.96783	0.975182	0.715441	1.32922	1.08669	0.795146	1.48512
6.96509	0.975188	0.715482	1.32916	1.08669	0.795185	1.48504
5.56879	0.978619	0.738579	1.29667	1.08545	0.8173	1.44158
5.56605	0.978627	0.73863	1.2966	1.08545	0.817348	1.44149
5.54962	0.978672	0.738933	1.29619	1.08543	0.817635	1.44094
6.94867	0.975225	0.715727	1.32881	1.08667	0.795422	1.48457
6.94867	0.975225	0.715727	1.32881	1.08667	0.795422	1.48457
6.94867	0.975225	0.715727	1.32881	1.08667	0.795422	1.48457
6.94867	0.975225	0.715727	1.32881	1.08667	0.795422	1.48457
6.94867	0.975225	0.715727	1.32881	1.08667	0.795422	1.48457
6.94867	0.975225	0.715727	1.32881	1.08667	0.795422	1.48457
6.94867	0.975225	0.715727	1.32881	1.08667	0.795422	1.48457
6.94867	0.975225	0.715727	1.32881	1.08667	0.795422	1.48457
4.85421	0.980776	0.752715	1.27794	1.08459	0.830556	1.41632
6.94867	0.975225	0.715727	1.32881	1.08667	0.795422	1.48457
6.94593	0.975231	0.715768	1.32875	1.08667	0.795461	1.48449
4.86516	0.98074	0.752483	1.27824	1.08461	0.830341	1.41673
5.48118	0.978864	0.740208	1.29447	1.08536	0.818843	1.43863
6.94867	0.975225	0.715727	1.32881	1.08667	0.795422	1.48457
6.94867	0.975225	0.715727	1.32881	1.08667	0.795422	1.48457
6.94867	0.975225	0.715727	1.32881	1.08667	0.795422	1.48457
5.60438	0.978521	0.737926	1.29756	1.08549	0.816679	1.44278
6.94867	0.975225	0.715727	1.32881	1.08667	0.795422	1.48457
6.94867	0.975225	0.715727	1.32881	1.08667	0.795422	1.48457
5.48392	0.978856	0.740156	1.29454	1.08536	0.818795	1.43872
3.05818	0.988454	0.797718	1.2248	1.08056	0.870081	1.34196
6.94867	0.975225	0.715727	1.32881	1.08667	0.795422	1.48457
5.53867	0.978703	0.739136	1.29592	1.08542	0.817828	1.44057
6.94867	0.975225	0.715727	1.32881	1.08667	0.795422	1.48457
6.94319	0.975237	0.715809	1.32869	1.08667	0.7955	1.48441
6.95688	0.975207	0.715605	1.32899	1.08668	0.795303	1.48481
5.27584	0.979459	0.744135	1.2892	1.08513	0.822549	1.43154
6.94319	0.975237	0.715809	1.32869	1.08667	0.7955	1.48441
6.94867	0.975225	0.715727	1.32881	1.08667	0.795422	1.48457
5.53046	0.978726	0.739288	1.29571	1.08541	0.817972	1.44029
6.94867	0.975225	0.715727	1.32881	1.08667	0.795422	1.48457
6.94867	0.975225	0.715727	1.32881	1.08667	0.795422	1.48457
5.52772	0.978733	0.739339	1.29564	1.08541	0.81802	1.4402
4.82136	0.980884	0.753414	1.27703	1.08454	0.831203	1.4151
6.94593	0.975231	0.715768	1.32875	1.08667	0.795461	1.48449
6.94593	0.975231	0.715768	1.32875	1.08667	0.795461	1.48449
5.54689	0.97868	0.738984	1.29612	1.08543	0.817683	1.44085
5.5332	0.978718	0.739238	1.29578	1.08542	0.817924	1.44039
5.4538	0.978942	0.740722	1.29377	1.08533	0.81933	1.43769
6.94867	0.975225	0.715727	1.32881	1.08667	0.795422	1.48457
6.94867	0.975225	0.715727	1.32881	1.08667	0.795422	1.48457
5.51403	0.978772	0.739594	1.2953	1.0854	0.818262	1.43974
6.94867	0.975225	0.715727	1.32881	1.08667	0.795422	1.48457
5.58795	0.978566	0.738227	1.29715	1.08547	0.816965	1.44223
5.577	0.978596	0.738428	1.29688	1.08546	0.817156	1.44186
6.94593	0.975231	0.715768	1.32875	1.08667	0.795461	1.48449
6.94593	0.975231	0.715768	1.32875	1.08667	0.795461	1.48449
5.64545	0.978409	0.737177	1.29858	1.08553	0.815967	1.44414
6.94593	0.975231	0.715768	1.32875	1.08667	0.795461	1.48449
5.39357	0.979114	0.741864	1.29224	1.08527	0.820409	1.43563
4.85695	0.980767	0.752657	1.27801	1.08459	0.830502	1.41643
5.57426	0.978604	0.738479	1.29681	1.08546	0.817204	1.44177
4.82957	0.980857	0.753239	1.27726	1.08456	0.831041	1.41541
6.96783	0.975182	0.715441	1.32922	1.08669	0.795146	1.48512
5.53046	0.978726	0.739288	1.29571	1.08541	0.817972	1.44029
6.94593	0.975231	0.715768	1.32875	1.08667	0.795461	1.48449
6.94593	0.975231	0.715768	1.32875	1.08667	0.795461	1.48449
5.52498	0.978741	0.73939	1.29557	1.08541	0.818069	1.44011
6.94867	0.975225	0.715727	1.32881	1.08667	0.795422	1.48457
5.52772	0.978733	0.739339	1.29564	1.08541	0.81802	1.4402
6.94867	0.975225	0.715727	1.32881	1.08667	0.795422	1.48457
6.94867	0.975225	0.715727	1.32881	1.08667	0.795422	1.48457
6.94593	0.975231	0.715768	1.32875	1.08667	0.795461	1.48449
6.94593	0.975231	0.715768	1.32875	1.08667	0.795461	1.48449
6.94593	0.975231	0.715768	1.32875	1.08667	0.795461	1.48449
6.94593	0.975231	0.715768	1.32875	1.08667	0.795461	1.48449
6.94593	0.975231	0.715768	1.32875	1.08667	0.795461	1.48449
6.94593	0.975231	0.715768	1.32875	1.08667	0.795461	1.48449
4.83504	0.980839	0.753122	1.27741	1.08456	0.830933	1.41561
5.42916	0.979012	0.741188	1.29315	1.08531	0.81977	1.43685
6.94593	0.975231	0.715768	1.32875	1.08667	0.795461	1.48449
6.94593	0.975231	0.715768	1.32875	1.08667	0.795461	1.48449
6.94593	0.975231	0.715768	1.32875	1.08667	0.795461	1.48449
6.94593	0.975231	0.715768	1.32875	1.08667	0.795461	1.48449
5.47296	0.978887	0.740362	1.29426	1.08535	0.818989	1.43835
6.94593	0.975231	0.715768	1.32875	1.08667	0.795461	1.48449
5.45106	0.97895	0.740774	1.2937	1.08533	0.819379	1.4376
5.54689	0.97868	0.738984	1.29612	1.08543	0.817683	1.44085
6.94593	0.975231	0.715768	1.32875	1.08667	0.795461	1.48449
6.94593	0.975231	0.715768	1.32875	1.08667	0.795461	1.48449
6.94593	0.975231	0.715768	1.32875	1.08667	0.795461	1.48449
6.94593	0.975231	0.715768	1.32875	1.08667	0.795461	1.48449
6.94593	0.975231	0.715768	1.32875	1.08667	0.795461	1.48449
6.28611	0.97676	0.726109	1.31393	1.08612	0.805398	1.46469
6.94593	0.975231	0.715768	1.32875	1.08667	0.795461	1.48449
6.94593	0.975231	0.715768	1.32875	1.08667	0.795461	1.48449
5.67556	0.978327	0.736632	1.29932	1.08556	0.815448	1.44514
6.94593	0.975231	0.715768	1.32875	1.08667	0.795461	1.48449
6.94593	0.975231	0.715768	1.32875	1.08667	0.795461	1.48449
5.54415	0.978687	0.739035	1.29605	1.08543	0.817732	1.44076
6.94593	0.975231	0.715768	1.32875	1.08667	0.795461	1.48449
5.52225	0.978749	0.739441	1.2955	1.0854	0.818117	1.44002
4.29021	0.982774	0.765358	1.26195	1.08368	0.842122	1.39452
5.47296	0.978887	0.740362	1.29426	1.08535	0.818989	1.43835
6.94593	0.975231	0.715768	1.32875	1.08667	0.795461	1.48449
6.94593	0.975231	0.715768	1.32875	1.08667	0.795461	1.48449
6.94593	0.975231	0.715768	1.32875	1.08667	0.795461	1.48449
5.51951	0.978756	0.739492	1.29544	1.0854	0.818165	1.43993
5.50308	0.978802	0.739798	1.29502	1.08538	0.818455	1.43937
6.94593	0.975231	0.715768	1.32875	1.08667	0.795461	1.48449
6.94593	0.975231	0.715768	1.32875	1.08667	0.795461	1.48449
6.94593	0.975231	0.715768	1.32875	1.08667	0.795461	1.48449
6.94593	0.975231	0.715768	1.32875	1.08667	0.795461	1.48449
6.94593	0.975231	0.715768	1.32875	1.08667	0.795461	1.48449
6.94593	0.975231	0.715768	1.32875	1.08667	0.795461	1.48449
4.72827	0.981197	0.755419	1.27446	1.08441	0.833054	1.4116
5.54689	0.97868	0.738984	1.29612	1.08543	0.817683	1.44085
6.94593	0.975231	0.715768	1.32875	1.08667	0.795461	1.48449
6.94319	0.975237	0.715809	1.32869	1.08667	0.7955	1.48441
5.32238	0.979321	0.743231	1.29041	1.08519	0.821698	1.43317
6.94593	0.975231	0.715768	1.32875	1.08667	0.795461	1.48449
5.48939	0.978841	0.740054	1.29468	1.08537	0.818698	1.43891
4.70363	0.981281	0.755956	1.27377	1.08437	0.833548	1.41066
5.54141	0.978695	0.739085	1.29599	1.08542	0.81778	1.44066
6.94319	0.975237	0.715809	1.32869	1.08667	0.7955	1.48441
5.3525	0.979233	0.742651	1.29118	1.08522	0.821151	1.43421
6.94319	0.975237	0.715809	1.32869	1.08667	0.7955	1.48441
4.90075	0.980624	0.751733	1.27921	1.08466	0.829645	1.41805
5.08966	0.980023	0.747836	1.2843	1.08491	0.826018	1.42494
4.85695	0.980767	0.752657	1.27801	1.08459	0.830502	1.41643
6.94319	0.975237	0.715809	1.32869	1.08667	0.7955	1.48441
6.94319	0.975237	0.715809	1.32869	1.08667	0.7955	1.48441
5.52225	0.978749	0.739441	1.2955	1.0854	0.818117	1.44002
6.94319	0.975237	0.715809	1.32869	1.08667	0.7955	1.48441
6.94319	0.975237	0.715809	1.32869	1.08667	0.7955	1.48441
6.94319	0.975237	0.715809	1.32869	1.08667	0.7955	1.48441
4.82409	0.980875	0.753356	1.27711	1.08455	0.831149	1.4152
6.94593	0.975231	0.715768	1.32875	1.08667	0.795461	1.48449
6.94319	0.975237	0.715809	1.32869	1.08667	0.7955	1.48441
6.94319	0.975237	0.715809	1.32869	1.08667	0.7955	1.48441
5.52498	0.978741	0.73939	1.29557	1.08541	0.818069	1.44011
6.94319	0.975237	0.715809	1.32869	1.08667	0.7955	1.48441
5.48665	0.978849	0.740105	1.29461	1.08537	0.818746	1.43881
6.94319	0.975237	0.715809	1.32869	1.08667	0.7955	1.48441
5.53046	0.978726	0.739288	1.29571	1.08541	0.817972	1.44029
5.3963	0.979106	0.741812	1.29231	1.08527	0.82036	1.43572
6.94319	0.975237	0.715809	1.32869	1.08667	0.7955	1.48441
6.94319	0.975237	0.715809	1.32869	1.08667	0.7955	1.48441
5.52772	0.978733	0.739339	1.29564	1.08541	0.81802	1.4402
4.83504	0.980839	0.753122	1.27741	1.08456	0.830933	1.41561
6.94319	0.975237	0.715809	1.32869	1.08667	0.7955	1.48441
4.85695	0.980767	0.752657	1.27801	1.08459	0.830502	1.41643
5.51129	0.978779	0.739645	1.29523	1.08539	0.81831	1.43965
4.8679	0.980731	0.752425	1.27831	1.08461	0.830287	1.41683
6.94867	0.975225	0.715727	1.32881	1.08667	0.795422	1.48457
4.84052	0.980821	0.753006	1.27756	1.08457	0.830825	1.41581
5.28131	0.979442	0.744029	1.28934	1.08514	0.822449	1.43174
5.45106	0.97895	0.740774	1.2937	1.08533	0.819379	1.4376
6.96235	0.975195	0.715523	1.3291	1.08668	0.795225	1.48496
5.46475	0.978911	0.740516	1.29405	1.08534	0.819135	1.43807
6.94319	0.975237	0.715809	1.32869	1.08667	0.7955	1.48441
6.94319	0.975237	0.715809	1.32869	1.08667	0.7955	1.48441
5.42642	0.97902	0.74124	1.29308	1.0853	0.819819	1.43676
6.94319	0.975237	0.715809	1.32869	1.08667	0.7955	1.48441
5.37988	0.979154	0.742126	1.29189	1.08525	0.820656	1.43516
5.44011	0.978981	0.740981	1.29343	1.08532	0.819575	1.43723
6.94319	0.975237	0.715809	1.32869	1.08667	0.7955	1.48441
5.48118	0.978864	0.740208	1.29447	1.08536	0.818843	1.43863
5.51129	0.978779	0.739645	1.29523	1.08539	0.81831	1.43965
5.53046	0.978726	0.739288	1.29571	1.08541	0.817972	1.44029
4.83778	0.98083	0.753064	1.27748	1.08457	0.830879	1.41571
6.94045	0.975243	0.71585	1.32863	1.08667	0.79554	1.48433
6.94867	0.975225	0.715727	1.32881	1.08667	0.795422	1.48457
5.46475	0.978911	0.740516	1.29405	1.08534	0.819135	1.43807
6.94045	0.975243	0.71585	1.32863	1.08667	0.79554	1.48433
6.94045	0.975243	0.71585	1.32863	1.08667	0.79554	1.48433
5.24298	0.979556	0.744779	1.28834	1.0851	0.823154	1.43039
6.94045	0.975243	0.71585	1.32863	1.08667	0.79554	1.48433
6.94045	0.975243	0.71585	1.32863	1.08667	0.79554	1.48433
4.72279	0.981216	0.755538	1.2743	1.0844	0.833163	1.41139
1.13347	1.00756	0.828771	1.22491	1.06911	0.877694	1.30228
6.94045	0.975243	0.71585	1.32863	1.08667	0.79554	1.48433
4.73374	0.981178	0.7553	1.27461	1.08441	0.832944	1.41181
5.50856	0.978787	0.739696	1.29516	1.08539	0.818359	1.43955
6.94045	0.975243	0.71585	1.32863	1.08667	0.79554	1.48433
6.94045	0.975243	0.71585	1.32863	1.08667	0.79554	1.48433
4.74196	0.981151	0.755122	1.27484	1.08443	0.83278	1.41212
6.94045	0.975243	0.71585	1.32863	1.08667	0.79554	1.48433
6.93771	0.975249	0.715891	1.32857	1.08666	0.795579	1.48425
5.51951	0.978756	0.739492	1.29544	1.0854	0.818165	1.43993
4.20808	0.983092	0.767316	1.25955	1.08352	0.843887	1.39121
5.41273	0.979059	0.741499	1.29273	1.08529	0.820065	1.43629
1.58248	1.00137	0.834333	1.20185	1.07243	0.891439	1.29017
6.95688	0.975207	0.715605	1.32899	1.08668	0.795303	1.48481
4.75565	0.981104	0.754825	1.27522	1.08445	0.832507	1.41263
5.50856	0.978787	0.739696	1.29516	1.08539	0.818359	1.43955
6.94319	0.975237	0.715809	1.32869	1.08667	0.7955	1.48441
6.94045	0.975243	0.71585	1.32863	1.08667	0.79554	1.48433
5.37988	0.979154	0.742126	1.29189	1.08525	0.820656	1.43516
6.94045	0.975243	0.71585	1.32863	1.08667	0.79554	1.48433
4.89254	0.98065	0.751905	1.27898	1.08464	0.829806	1.41775
5.40726	0.979075	0.741603	1.29259	1.08528	0.820163	1.4361
5.51951	0.978756	0.739492	1.29544	1.0854	0.818165	1.43993
6.94045	0.975243	0.71585	1.32863	1.08667	0.79554	1.48433
6.94045	0.975243	0.71585	1.32863	1.08667	0.79554	1.48433
5.47023	0.978895	0.740413	1.29419	1.08535	0.819038	1.43825
4.61602	0.981584	0.757886	1.27131	1.08423	0.835321	1.40732
5.46201	0.978918	0.740568	1.29398	1.08534	0.819184	1.43797
6.94045	0.975243	0.71585	1.32863	1.08667	0.79554	1.48433
6.94593	0.975231	0.715768	1.32875	1.08667	0.795461	1.48449
5.53046	0.978726	0.739288	1.29571	1.08541	0.817972	1.44029
5.56057	0.978642	0.738731	1.29647	1.08544	0.817443	1.44131
6.94045	0.975243	0.71585	1.32863	1.08667	0.79554	1.48433
6.94045	0.975243	0.71585	1.32863	1.08667	0.79554	1.48433
6.94045	0.975243	0.71585	1.32863	1.08667	0.79554	1.48433
6.94045	0.975243	0.71585	1.32863	1.08667	0.79554	1.48433
4.85969	0.980758	0.752599	1.27809	1.0846	0.830449	1.41653
5.48118	0.978864	0.740208	1.29447	1.08536	0.818843	1.43863
5.51403	0.978772	0.739594	1.2953	1.0854	0.818262	1.43974
6.96783	0.975182	0.715441	1.32922	1.08669	0.795146	1.48512
6.96509	0.975188	0.715482	1.32916	1.08669	0.795185	1.48504
6.96235	0.975195	0.715523	1.3291	1.08668	0.795225	1.48496
5.50856	0.978787	0.739696	1.29516	1.08539	0.818359	1.43955
6.95688	0.975207	0.715605	1.32899	1.08668	0.795303	1.48481
6.95688	0.975207	0.715605	1.32899	1.08668	0.795303	1.48481
6.94867	0.975225	0.715727	1.32881	1.08667	0.795422	1.48457
6.94867	0.975225	0.715727	1.32881	1.08667	0.795422	1.48457
6.94593	0.975231	0.715768	1.32875	1.08667	0.795461	1.48449
6.94319	0.975237	0.715809	1.32869	1.08667	0.7955	1.48441
6.94319	0.975237	0.715809	1.32869	1.08667	0.7955	1.48441
5.10609	0.979973	0.747504	1.28474	1.08493	0.825708	1.42553
5.56605	0.978627	0.73863	1.2966	1.08545	0.817348	1.44149
6.73238	0.975709	0.719008	1.32406	1.0865	0.79858	1.47822
5.18001	0.979746	0.746023	1.28669	1.08502	0.824321	1.42817
5.14168	0.979863	0.746788	1.28568	1.08497	0.825038	1.4268
5.16085	0.979804	0.746405	1.28619	1.085	0.824679	1.42748
4.6872	0.981337	0.756315	1.27331	1.08434	0.833879	1.41004
5.06502	0.9801	0.748336	1.28364	1.08488	0.826485	1.42405
5.13073	0.979897	0.747008	1.28539	1.08496	0.825244	1.42641
5.12526	0.979913	0.747118	1.28525	1.08495	0.825347	1.42621
5.14716	0.979846	0.746679	1.28583	1.08498	0.824935	1.427
5.27036	0.979475	0.744242	1.28906	1.08513	0.82265	1.43135
5.16359	0.979796	0.74635	1.28626	1.085	0.824628	1.42758
5.16632	0.979788	0.746296	1.28633	1.085	0.824577	1.42768
5.15537	0.979821	0.746514	1.28604	1.08499	0.824782	1.42729
5.07871	0.980058	0.748058	1.28401	1.08489	0.826225	1.42454
4.46817	0.982111	0.761218	1.2671	1.08399	0.838367	1.40158
6.73511	0.975703	0.718966	1.32412	1.0865	0.79854	1.4783
5.1937	0.979705	0.745751	1.28705	1.08504	0.824067	1.42865
5.16632	0.979788	0.746296	1.28633	1.085	0.824577	1.42768
5.05133	0.980143	0.748615	1.28328	1.08486	0.826745	1.42355
4.70637	0.981272	0.755896	1.27384	1.08437	0.833493	1.41077
4.67625	0.981375	0.756555	1.273	1.08433	0.8341	1.40962
5.16359	0.979796	0.74635	1.28626	1.085	0.824628	1.42758
4.64339	0.981489	0.757279	1.27208	1.08428	0.834765	1.40837
5.12526	0.979913	0.747118	1.28525	1.08495	0.825347	1.42621
5.16359	0.979796	0.74635	1.28626	1.085	0.824628	1.42758
4.68446	0.981347	0.756375	1.27323	1.08434	0.833934	1.40994
5.0486	0.980152	0.748671	1.2832	1.08485	0.826797	1.42346
5.10062	0.97999	0.747615	1.28459	1.08492	0.825811	1.42533
4.69268	0.981319	0.756195	1.27346	1.08435	0.833768	1.41025
4.68172	0.981356	0.756435	1.27316	1.08434	0.833989	1.40983
5.12799	0.979905	0.747063	1.28532	1.08496	0.825295	1.42631
5.16085	0.979804	0.746405	1.28619	1.085	0.824679	1.42748
5.16906	0.979779	0.746241	1.2864	1.08501	0.824526	1.42778
4.70637	0.981272	0.755896	1.27384	1.08437	0.833493	1.41077
5.16085	0.979804	0.746405	1.28619	1.085	0.824679	1.42748
5.16632	0.979788	0.746296	1.28633	1.085	0.824577	1.42768
4.68172	0.981356	0.756435	1.27316	1.08434	0.833989	1.40983
5.16632	0.979788	0.746296	1.28633	1.085	0.824577	1.42768
5.14442	0.979855	0.746734	1.28575	1.08498	0.824987	1.4269
5.16632	0.979788	0.746296	1.28633	1.085	0.824577	1.42768
4.03285	0.983793	0.771595	1.25435	1.08317	0.847716	1.38403
4.68446	0.981347	0.756375	1.27323	1.08434	0.833934	1.40994
4.67625	0.981375	0.756555	1.273	1.08433	0.8341	1.40962
5.10883	0.979964	0.747449	1.28481	1.08493	0.825656	1.42563
4.54483	0.981835	0.759478	1.26929	1.08412	0.836779	1.40457
5.73306	0.978172	0.735598	1.30074	1.08561	0.814463	1.44703
1.61533	1.00097	0.834181	1.2011	1.07266	0.891812	1.29019
4.6872	0.981337	0.756315	1.27331	1.08434	0.833879	1.41004
5.30048	0.979386	0.743656	1.28984	1.08516	0.822098	1.43241
4.68446	0.981347	0.756375	1.27323	1.08434	0.833934	1.40994
5.11978	0.97993	0.747228	1.2851	1.08495	0.82545	1.42602
5.79329	0.978012	0.734524	1.30221	1.08567	0.81344	1.44901
4.68446	0.981347	0.756375	1.27323	1.08434	0.833934	1.40994
5.14442	0.979855	0.746734	1.28575	1.08498	0.824987	1.4269
5.14716	0.979846	0.746679	1.28583	1.08498	0.824935	1.427
5.1499	0.979838	0.746624	1.2859	1.08498	0.824884	1.42709
5.10609	0.979973	0.747504	1.28474	1.08493	0.825708	1.42553
5.14442	0.979855	0.746734	1.28575	1.08498	0.824987	1.4269
5.14168	0.979863	0.746788	1.28568	1.08497	0.825038	1.4268
4.65708	0.981441	0.756977	1.27247	1.0843	0.834487	1.40889
4.89528	0.980641	0.751848	1.27906	1.08465	0.829752	1.41785
5.16359	0.979796	0.74635	1.28626	1.085	0.824628	1.42758
5.15811	0.979813	0.74646	1.28612	1.08499	0.82473	1.42739
4.68994	0.981328	0.756255	1.27339	1.08435	0.833824	1.41014
5.13621	0.97988	0.746898	1.28554	1.08497	0.825141	1.42661
5.09788	0.979998	0.74767	1.28452	1.08492	0.825863	1.42523
5.10883	0.979964	0.747449	1.28481	1.08493	0.825656	1.42563
5.15811	0.979813	0.74646	1.28612	1.08499	0.82473	1.42739
5.14442	0.979855	0.746734	1.28575	1.08498	0.824987	1.4269
5.13621	0.97988	0.746898	1.28554	1.08497	0.825141	1.42661
5.13895	0.979871	0.746843	1.28561	1.08497	0.825089	1.4267
5.25941	0.979507	0.744457	1.28877	1.08511	0.822851	1.43097
5.13621	0.97988	0.746898	1.28554	1.08497	0.825141	1.42661
5.14442	0.979855	0.746734	1.28575	1.08498	0.824987	1.4269
4.99932	0.980307	0.749682	1.28188	1.08479	0.827739	1.42167
4.0219	0.983838	0.771867	1.25402	1.08315	0.847958	1.38357
5.13073	0.979897	0.747008	1.28539	1.08496	0.825244	1.42641
5.07871	0.980058	0.748058	1.28401	1.08489	0.826225	1.42454
5.14168	0.979863	0.746788	1.28568	1.08497	0.825038	1.4268
5.1499	0.979838	0.746624	1.2859	1.08498	0.824884	1.42709
4.6653	0.981413	0.756796	1.2727	1.08431	0.834321	1.40921
5.05955	0.980117	0.748448	1.2835	1.08487	0.826589	1.42385
4.64066	0.981498	0.75734	1.272	1.08427	0.83482	1.40826
4.66256	0.981422	0.756856	1.27262	1.08431	0.834376	1.4091
5.14716	0.979846	0.746679	1.28583	1.08498	0.824935	1.427
5.13895	0.979871	0.746843	1.28561	1.08497	0.825089	1.4267
4.67077	0.981394	0.756676	1.27285	1.08432	0.83421	1.40941
5.14442	0.979855	0.746734	1.28575	1.08498	0.824987	1.4269
5.14442	0.979855	0.746734	1.28575	1.08498	0.824987	1.4269
5.14168	0.979863	0.746788	1.28568	1.08497	0.825038	1.4268
5.05407	0.980134	0.748559	1.28335	1.08486	0.826693	1.42365
5.17728	0.979754	0.746078	1.28662	1.08502	0.824372	1.42807
4.68172	0.981356	0.756435	1.27316	1.08434	0.833989	1.40983
0.0164271	1.027	0.647297	1.62944	1.09509	0.690243	1.73738
4.6872	0.981337	0.756315	1.27331	1.08434	0.833879	1.41004
5.12799	0.979905	0.747063	1.28532	1.08496	0.825295	1.42631
4.64066	0.981498	0.75734	1.272	1.08427	0.83482	1.40826
4.6653	0.981413	0.756796	1.2727	1.08431	0.834321	1.40921
5.12799	0.979905	0.747063	1.28532	1.08496	0.825295	1.42631
5.08145	0.980049	0.748003	1.28408	1.0849	0.826173	1.42464
4.6653	0.981413	0.756796	1.2727	1.08431	0.834321	1.40921
5.13073	0.979897	0.747008	1.28539	1.08496	0.825244	1.42641
5.08145	0.980049	0.748003	1.28408	1.0849	0.826173	1.42464
4.65161	0.98146	0.757098	1.27231	1.08429	0.834598	1.40868
4.50924	0.981963	0.760283	1.26828	1.08406	0.837514	1.40318
4.70637	0.981272	0.755896	1.27384	1.08437	0.833493	1.41077
5.09788	0.979998	0.74767	1.28452	1.08492	0.825863	1.42523
5.15811	0.979813	0.74646	1.28612	1.08499	0.82473	1.42739
5.10609	0.979973	0.747504	1.28474	1.08493	0.825708	1.42553
5.12799	0.979905	0.747063	1.28532	1.08496	0.825295	1.42631
4.56126	0.981777	0.759109	1.26976	1.08415	0.836442	1.4052
2.45311	0.992479	0.815757	1.20749	1.07801	0.883893	1.31476
5.09788	0.979998	0.74767	1.28452	1.08492	0.825863	1.42523
4.97194	0.980394	0.750247	1.28114	1.08475	0.828266	1.42067
4.93634	0.980508	0.750987	1.28018	1.0847	0.828954	1.41936
5.04038	0.980177	0.748839	1.28298	1.08484	0.826954	1.42316
5.12252	0.979922	0.747173	1.28517	1.08495	0.825398	1.42612
4.57221	0.981738	0.758863	1.27007	1.08416	0.836217	1.40563
5.14716	0.979846	0.746679	1.28583	1.08498	0.824935	1.427
5.85626	0.977846	0.733413	1.30374	1.08573	0.812381	1.45106
4.68994	0.981328	0.756255	1.27339	1.08435	0.833824	1.41014
4.92813	0.980535	0.751159	1.27995	1.08469	0.829113	1.41906
4.64887	0.98147	0.757158	1.27223	1.08428	0.834654	1.40858
4.68172	0.981356	0.756435	1.27316	1.08434	0.833989	1.40983
5.16906	0.979779	0.746241	1.2864	1.08501	0.824526	1.42778
4.61054	0.981603	0.758008	1.27115	1.08422	0.835433	1.40711
5.10062	0.97999	0.747615	1.28459	1.08492	0.825811	1.42533
5.12799	0.979905	0.747063	1.28532	1.08496	0.825295	1.42631
4.93087	0.980526	0.751102	1.28003	1.0847	0.82906	1.41916
5.11978	0.97993	0.747228	1.2851	1.08495	0.82545	1.42602
5.12799	0.979905	0.747063	1.28532	1.08496	0.825295	1.42631
4.65982	0.981432	0.756917	1.27254	1.0843	0.834432	1.409
4.64066	0.981498	0.75734	1.272	1.08427	0.83482	1.40826
5.10883	0.979964	0.747449	1.28481	1.08493	0.825656	1.42563
0.54757	1.01847	0.79319	1.30772	1.06489	0.827644	1.37015
5.08693	0.980032	0.747892	1.28423	1.0849	0.82607	1.42484
5.12252	0.979922	0.747173	1.28517	1.08495	0.825398	1.42612
5.12526	0.979913	0.747118	1.28525	1.08495	0.825347	1.42621
4.95825	0.980438	0.750531	1.28077	1.08473	0.82853	1.42017
5.0486	0.980152	0.748671	1.2832	1.08485	0.826797	1.42346
4.62149	0.981565	0.757764	1.27146	1.08424	0.83521	1.40753
4.92813	0.980535	0.751159	1.27995	1.08469	0.829113	1.41906
5.12252	0.979922	0.747173	1.28517	1.08495	0.825398	1.42612
4.65161	0.98146	0.757098	1.27231	1.08429	0.834598	1.40868
5.11978	0.97993	0.747228	1.2851	1.08495	0.82545	1.42602
5.14168	0.979863	0.746788	1.28568	1.08497	0.825038	1.4268
5.10883	0.979964	0.747449	1.28481	1.08493	0.825656	1.42563
4.62149	0.981565	0.757764	1.27146	1.08424	0.83521	1.40753
5.10609	0.979973	0.747504	1.28474	1.08493	0.825708	1.42553
4.49281	0.982022	0.760656	1.26781	1.08403	0.837855	1.40254
4.62697	0.981546	0.757643	1.27162	1.08425	0.835098	1.40774
4.64613	0.981479	0.757219	1.27216	1.08428	0.834709	1.40847
4.65161	0.98146	0.757098	1.27231	1.08429	0.834598	1.40868
4.61054	0.981603	0.758008	1.27115	1.08422	0.835433	1.40711
4.6653	0.981413	0.756796	1.2727	1.08431	0.834321	1.40921
4.60233	0.981632	0.75819	1.27092	1.08421	0.8356	1.40679
5.03491	0.980195	0.748951	1.28284	1.08484	0.827058	1.42296
5.08966	0.980023	0.747836	1.2843	1.08491	0.826018	1.42494
4.64066	0.981498	0.75734	1.272	1.08427	0.83482	1.40826
4.64613	0.981479	0.757219	1.27216	1.08428	0.834709	1.40847
4.62971	0.981536	0.757582	1.2717	1.08425	0.835043	1.40784
5.10883	0.979964	0.747449	1.28481	1.08493	0.825656	1.42563
4.6653	0.981413	0.756796	1.2727	1.08431	0.834321	1.40921
4.9911	0.980333	0.749851	1.28166	1.08478	0.827897	1.42137
4.64887	0.98147	0.757158	1.27223	1.08428	0.834654	1.40858
5.10062	0.97999	0.747615	1.28459	1.08492	0.825811	1.42533
5.14442	0.979855	0.746734	1.28575	1.08498	0.824987	1.4269
4.67077	0.981394	0.756676	1.27285	1.08432	0.83421	1.40941
4.59411	0.981661	0.758373	1.27069	1.0842	0.835768	1.40647
4.66804	0.981403	0.756736	1.27277	1.08431	0.834266	1.40931
5.16085	0.979804	0.746405	1.28619	1.085	0.824679	1.42748
4.97741	0.980377	0.750134	1.28129	1.08476	0.82816	1.42087
4.64066	0.981498	0.75734	1.272	1.08427	0.83482	1.40826
4.5859	0.98169	0.758557	1.27046	1.08419	0.835936	1.40616
4.63792	0.981508	0.7574	1.27193	1.08427	0.834876	1.40816
4.64066	0.981498	0.75734	1.272	1.08427	0.83482	1.40826
4.55305	0.981806	0.759294	1.26953	1.08413	0.83661	1.40489
5.08419	0.98004	0.747947	1.28415	1.0849	0.826121	1.42474
4.64066	0.981498	0.75734	1.272	1.08427	0.83482	1.40826
4.6078	0.981613	0.758068	1.27108	1.08422	0.835489	1.407
4.85695	0.980767	0.752657	1.27801	1.08459	0.830502	1.41643
4.67899	0.981366	0.756495	1.27308	1.08433	0.834044	1.40973
5.12526	0.979913	0.747118	1.28525	1.08495	0.825347	1.42621
4.67077	0.981394	0.756676	1.27285	1.08432	0.83421	1.40941
5.04586	0.98016	0.748727	1.28313	1.08485	0.826849	1.42336
4.7091	0.981262	0.755836	1.27392	1.08438	0.833438	1.41087
4.56947	0.981748	0.758925	1.26999	1.08416	0.836273	1.40552
4.55031	0.981816	0.759355	1.26945	1.08413	0.836667	1.40478
4.56947	0.981748	0.758925	1.26999	1.08416	0.836273	1.40552
4.45722	0.982151	0.761469	1.26679	1.08397	0.838596	1.40115
5.09788	0.979998	0.74767	1.28452	1.08492	0.825863	1.42523
5.08145	0.980049	0.748003	1.28408	1.0849	0.826173	1.42464
5.08966	0.980023	0.747836	1.2843	1.08491	0.826018	1.42494
5.10883	0.979964	0.747449	1.28481	1.08493	0.825656	1.42563
5.10883	0.979964	0.747449	1.28481	1.08493	0.825656	1.42563
5.04038	0.980177	0.748839	1.28298	1.08484	0.826954	1.42316
4.79945	0.980957	0.753882	1.27643	1.08451	0.831636	1.41428
4.63792	0.981508	0.7574	1.27193	1.08427	0.834876	1.40816
5.08966	0.980023	0.747836	1.2843	1.08491	0.826018	1.42494
5.02669	0.98022	0.749119	1.28262	1.08483	0.827215	1.42266
4.13963	0.983361	0.768971	1.25752	1.08339	0.845372	1.38842
4.49281	0.982022	0.760656	1.26781	1.08403	0.837855	1.40254
4.61875	0.981574	0.757825	1.27139	1.08424	0.835265	1.40742
5.10883	0.979964	0.747449	1.28481	1.08493	0.825656	1.42563
5.10883	0.979964	0.747449	1.28481	1.08493	0.825656	1.42563
5.10609	0.979973	0.747504	1.28474	1.08493	0.825708	1.42553
4.61054	0.981603	0.758008	1.27115	1.08422	0.835433	1.40711
5.10609	0.979973	0.747504	1.28474	1.08493	0.825708	1.42553
4.62423	0.981555	0.757703	1.27154	1.08425	0.835154	1.40763
5.10062	0.97999	0.747615	1.28459	1.08492	0.825811	1.42533
5.10335	0.979981	0.747559	1.28466	1.08492	0.825759	1.42543
4.49555	0.982012	0.760594	1.26789	1.08404	0.837798	1.40265
4.6078	0.981613	0.758068	1.27108	1.08422	0.835489	1.407
4.95277	0.980456	0.750645	1.28062	1.08473	0.828636	1.41996
5.08419	0.98004	0.747947	1.28415	1.0849	0.826121	1.42474
5.02943	0.980212	0.749063	1.28269	1.08483	0.827163	1.42276
5.0924	0.980015	0.747781	1.28437	1.08491	0.825966	1.42504
4.62149	0.981565	0.757764	1.27146	1.08424	0.83521	1.40753
5.34155	0.979265	0.742861	1.2909	1.08521	0.82135	1.43383
5.06229	0.980109	0.748392	1.28357	1.08487	0.826537	1.42395
5.0705	0.980083	0.748225	1.28379	1.08488	0.826381	1.42425
4.96372	0.98042	0.750418	1.28092	1.08474	0.828424	1.42037
4.61054	0.981603	0.758008	1.27115	1.08422	0.835433	1.40711
5.07871	0.980058	0.748058	1.28401	1.08489	0.826225	1.42454
4.72553	0.981206	0.755478	1.27438	1.0844	0.833109	1.4115
5.10883	0.979964	0.747449	1.28481	1.08493	0.825656	1.42563
5.02943	0.980212	0.749063	1.28269	1.08483	0.827163	1.42276
4.60233	0.981632	0.75819	1.27092	1.08421	0.8356	1.40679
4.56947	0.981748	0.758925	1.26999	1.08416	0.836273	1.40552
5.10883	0.979964	0.747449	1.28481	1.08493	0.825656	1.42563
5.0705	0.980083	0.748225	1.28379	1.08488	0.826381	1.42425
4.97467	0.980385	0.750191	1.28122	1.08476	0.828213	1.42077
5.03217	0.980203	0.749007	1.28276	1.08483	0.82711	1.42286
4.62971	0.981536	0.757582	1.2717	1.08425	0.835043	1.40784
5.05133	0.980143	0.748615	1.28328	1.08486	0.826745	1.42355
5.08966	0.980023	0.747836	1.2843	1.08491	0.826018	1.42494
5.07324	0.980075	0.748169	1.28386	1.08489	0.826329	1.42435
4.97194	0.980394	0.750247	1.28114	1.08475	0.828266	1.42067
5.08145	0.980049	0.748003	1.28408	1.0849	0.826173	1.42464
5.07871	0.980058	0.748058	1.28401	1.08489	0.826225	1.42454
4.49829	0.982002	0.760532	1.26797	1.08404	0.837741	1.40276
4.57221	0.981738	0.758863	1.27007	1.08416	0.836217	1.40563
5.08419	0.98004	0.747947	1.28415	1.0849	0.826121	1.42474
5.07871	0.980058	0.748058	1.28401	1.08489	0.826225	1.42454
4.47091	0.982101	0.761156	1.26718	1.084	0.83831	1.40168
5.07871	0.980058	0.748058	1.28401	1.08489	0.826225	1.42454
5.10609	0.979973	0.747504	1.28474	1.08493	0.825708	1.42553
5.01027	0.980272	0.749456	1.28217	1.0848	0.827529	1.42207
4.61328	0.981594	0.757947	1.27123	1.08423	0.835377	1.40721
6.55441	0.976119	0.721785	1.32007	1.08635	0.801249	1.4729
5.08693	0.980032	0.747892	1.28423	1.0849	0.82607	1.42484
5.06776	0.980092	0.74828	1.28372	1.08488	0.826433	1.42415
5.06776	0.980092	0.74828	1.28372	1.08488	0.826433	1.42415
5.06776	0.980092	0.74828	1.28372	1.08488	0.826433	1.42415
5.06502	0.9801	0.748336	1.28364	1.08488	0.826485	1.42405
5.06776	0.980092	0.74828	1.28372	1.08488	0.826433	1.42415
4.59138	0.981671	0.758435	1.27061	1.08419	0.835824	1.40637
4.4846	0.982052	0.760843	1.26757	1.08402	0.838025	1.40222
4.6078	0.981613	0.758068	1.27108	1.08422	0.835489	1.407
4.91444	0.980579	0.751445	1.27958	1.08467	0.829379	1.41856
5.08145	0.980049	0.748003	1.28408	1.0849	0.826173	1.42464
4.64887	0.98147	0.757158	1.27223	1.08428	0.834654	1.40858
5.08693	0.980032	0.747892	1.28423	1.0849	0.82607	1.42484
6.65572	0.975884	0.720195	1.32235	1.08643	0.799722	1.47594
4.91444	0.980579	0.751445	1.27958	1.08467	0.829379	1.41856
5.02943	0.980212	0.749063	1.28269	1.08483	0.827163	1.42276
5.02122	0.980238	0.749231	1.28247	1.08482	0.82732	1.42246
5.02943	0.980212	0.749063	1.28269	1.08483	0.827163	1.42276
5.02669	0.98022	0.749119	1.28262	1.08483	0.827215	1.42266
4.8679	0.980731	0.752425	1.27831	1.08461	0.830287	1.41683
4.58864	0.98168	0.758496	1.27054	1.08419	0.83588	1.40626
4.9692	0.980403	0.750304	1.28107	1.08475	0.828318	1.42057
5.02943	0.980212	0.749063	1.28269	1.08483	0.827163	1.42276
5.62355	0.978468	0.737576	1.29804	1.08551	0.816346	1.44341
2.00958	0.996541	0.828159	1.19916	1.07536	0.891408	1.29727
4.91718	0.98057	0.751388	1.27966	1.08468	0.829326	1.41866
4.60507	0.981622	0.758129	1.271	1.08422	0.835545	1.4069
4.58042	0.981709	0.758679	1.2703	1.08418	0.836048	1.40595
4.96646	0.980412	0.750361	1.28099	1.08475	0.828371	1.42047
4.97467	0.980385	0.750191	1.28122	1.08476	0.828213	1.42077
4.59685	0.981651	0.758312	1.27077	1.0842	0.835712	1.40658
0.755647	1.01406	0.8103	1.26907	1.06627	0.850493	1.33678
4.87611	0.980704	0.752252	1.27854	1.08462	0.830127	1.41714
5.04586	0.98016	0.748727	1.28313	1.08485	0.826849	1.42336
5.0924	0.980015	0.747781	1.28437	1.08491	0.825966	1.42504
5.01574	0.980255	0.749344	1.28232	1.08481	0.827424	1.42226
4.57769	0.981719	0.758741	1.27023	1.08417	0.836104	1.40584
5.05955	0.980117	0.748448	1.2835	1.08487	0.826589	1.42385
4.55305	0.981806	0.759294	1.26953	1.08413	0.83661	1.40489
5.02669	0.98022	0.749119	1.28262	1.08483	0.827215	1.42266
4.91444	0.980579	0.751445	1.27958	1.08467	0.829379	1.41856
5.01027	0.980272	0.749456	1.28217	1.0848	0.827529	1.42207
5.08145	0.980049	0.748003	1.28408	1.0849	0.826173	1.42464
4.97467	0.980385	0.750191	1.28122	1.08476	0.828213	1.42077
5.02669	0.98022	0.749119	1.28262	1.08483	0.827215	1.42266
5.04586	0.98016	0.748727	1.28313	1.08485	0.826849	1.42336
4.91718	0.98057	0.751388	1.27966	1.08468	0.829326	1.41866
4.69268	0.981319	0.756195	1.27346	1.08435	0.833768	1.41025
5.02122	0.980238	0.749231	1.28247	1.08482	0.82732	1.42246
4.95551	0.980447	0.750588	1.2807	1.08473	0.828583	1.42007
5.013	0.980264	0.7494	1.28225	1.08481	0.827477	1.42216
5.03491	0.980195	0.748951	1.28284	1.08484	0.827058	1.42296
5.02669	0.98022	0.749119	1.28262	1.08483	0.827215	1.42266
4.95551	0.980447	0.750588	1.2807	1.08473	0.828583	1.42007
4.93087	0.980526	0.751102	1.28003	1.0847	0.82906	1.41916
4.95003	0.980464	0.750702	1.28055	1.08472	0.828688	1.41986
4.51198	0.981953	0.760221	1.26836	1.08406	0.837458	1.40329
4.9117	0.980588	0.751503	1.27951	1.08467	0.829432	1.41845
4.95551	0.980447	0.750588	1.2807	1.08473	0.828583	1.42007
5.03491	0.980195	0.748951	1.28284	1.08484	0.827058	1.42296
4.58316	0.981699	0.758618	1.27038	1.08418	0.835992	1.40605
4.9911	0.980333	0.749851	1.28166	1.08478	0.827897	1.42137
5.02943	0.980212	0.749063	1.28269	1.08483	0.827163	1.42276
5.05955	0.980117	0.748448	1.2835	1.08487	0.826589	1.42385
4.95551	0.980447	0.750588	1.2807	1.08473	0.828583	1.42007
4.59138	0.981671	0.758435	1.27061	1.08419	0.835824	1.40637
5.05955	0.980117	0.748448	1.2835	1.08487	0.826589	1.42385
4.55031	0.981816	0.759355	1.26945	1.08413	0.836667	1.40478
5.00479	0.98029	0.749569	1.28203	1.0848	0.827634	1.42187
4.56674	0.981758	0.758986	1.26992	1.08415	0.836329	1.40542
5.01027	0.980272	0.749456	1.28217	1.0848	0.827529	1.42207
4.54209	0.981845	0.75954	1.26922	1.08411	0.836836	1.40446
4.56947	0.981748	0.758925	1.26999	1.08416	0.836273	1.40552
5.68378	0.978305	0.736483	1.29953	1.08557	0.815307	1.44541
5.05955	0.980117	0.748448	1.2835	1.08487	0.826589	1.42385
5.03217	0.980203	0.749007	1.28276	1.08483	0.82711	1.42286
4.61054	0.981603	0.758008	1.27115	1.08422	0.835433	1.40711
5.02943	0.980212	0.749063	1.28269	1.08483	0.827163	1.42276
5.02122	0.980238	0.749231	1.28247	1.08482	0.82732	1.42246
5.02669	0.98022	0.749119	1.28262	1.08483	0.827215	1.42266
5.06776	0.980092	0.74828	1.28372	1.08488	0.826433	1.42415
5.02669	0.98022	0.749119	1.28262	1.08483	0.827215	1.42266
4.97741	0.980377	0.750134	1.28129	1.08476	0.82816	1.42087
5.90828	0.97771	0.732503	1.305	1.08578	0.811513	1.45274
5.03217	0.980203	0.749007	1.28276	1.08483	0.82711	1.42286
4.96646	0.980412	0.750361	1.28099	1.08475	0.828371	1.42047
4.95003	0.980464	0.750702	1.28055	1.08472	0.828688	1.41986
5.00479	0.98029	0.749569	1.28203	1.0848	0.827634	1.42187
5.01027	0.980272	0.749456	1.28217	1.0848	0.827529	1.42207
4.30938	0.982702	0.764905	1.26251	1.08371	0.841713	1.39529
4.99384	0.980324	0.749794	1.28173	1.08478	0.827844	1.42147
5.00753	0.980281	0.749512	1.2821	1.0848	0.827582	1.42197
4.59685	0.981651	0.758312	1.27077	1.0842	0.835712	1.40658
4.52567	0.981904	0.759911	1.26875	1.08409	0.837175	1.40382
4.53388	0.981874	0.759725	1.26898	1.0841	0.837005	1.40414
5.00479	0.98029	0.749569	1.28203	1.0848	0.827634	1.42187
4.5065	0.981973	0.760345	1.2682	1.08406	0.837571	1.40308
5.00479	0.98029	0.749569	1.28203	1.0848	0.827634	1.42187
4.59138	0.981671	0.758435	1.27061	1.08419	0.835824	1.40637
4.55305	0.981806	0.759294	1.26953	1.08413	0.83661	1.40489
4.55578	0.981796	0.759232	1.2696	1.08414	0.836554	1.40499
4.55852	0.981787	0.75917	1.26968	1.08414	0.836498	1.4051
5.00753	0.980281	0.749512	1.2821	1.0848	0.827582	1.42197
4.57769	0.981719	0.758741	1.27023	1.08417	0.836104	1.40584
5.03217	0.980203	0.749007	1.28276	1.08483	0.82711	1.42286
4.97741	0.980377	0.750134	1.28129	1.08476	0.82816	1.42087
4.56674	0.981758	0.758986	1.26992	1.08415	0.836329	1.40542
4.56674	0.981758	0.758986	1.26992	1.08415	0.836329	1.40542
4.564	0.981767	0.759047	1.26984	1.08415	0.836385	1.40531
4.9911	0.980333	0.749851	1.28166	1.08478	0.827897	1.42137
4.53388	0.981874	0.759725	1.26898	1.0841	0.837005	1.40414
5.01027	0.980272	0.749456	1.28217	1.0848	0.827529	1.42207
5.013	0.980264	0.7494	1.28225	1.08481	0.827477	1.42216
4.55305	0.981806	0.759294	1.26953	1.08413	0.83661	1.40489
4.57221	0.981738	0.758863	1.27007	1.08416	0.836217	1.40563
5.00753	0.980281	0.749512	1.2821	1.0848	0.827582	1.42197
4.97467	0.980385	0.750191	1.28122	1.08476	0.828213	1.42077
4.97467	0.980385	0.750191	1.28122	1.08476	0.828213	1.42077
4.03285	0.983793	0.771595	1.25435	1.08317	0.847716	1.38403
4.87611	0.980704	0.752252	1.27854	1.08462	0.830127	1.41714
4.94182	0.980491	0.750873	1.28033	1.08471	0.828847	1.41956
4.49281	0.982022	0.760656	1.26781	1.08403	0.837855	1.40254
4.55031	0.981816	0.759355	1.26945	1.08413	0.836667	1.40478
5.66461	0.978357	0.73683	1.29905	1.08555	0.815636	1.44478
4.58316	0.981699	0.758618	1.27038	1.08418	0.835992	1.40605
4.54483	0.981835	0.759478	1.26929	1.08412	0.836779	1.40457
4.55031	0.981816	0.759355	1.26945	1.08413	0.836667	1.40478
4.49008	0.982032	0.760719	1.26773	1.08403	0.837912	1.40243
4.564	0.981767	0.759047	1.26984	1.08415	0.836385	1.40531
4.95551	0.980447	0.750588	1.2807	1.08473	0.828583	1.42007
4.94456	0.980482	0.750816	1.2804	1.08472	0.828794	1.41966
4.49555	0.982012	0.760594	1.26789	1.08404	0.837798	1.40265
4.99658	0.980316	0.749738	1.28181	1.08479	0.827792	1.42157
4.84052	0.980821	0.753006	1.27756	1.08457	0.830825	1.41581
4.37235	0.982464	0.76343	1.26434	1.08382	0.840377	1.3978
4.9117	0.980588	0.751503	1.27951	1.08467	0.829432	1.41845
5.02943	0.980212	0.749063	1.28269	1.08483	0.827163	1.42276
4.94182	0.980491	0.750873	1.28033	1.08471	0.828847	1.41956
4.55031	0.981816	0.759355	1.26945	1.08413	0.836667	1.40478
4.56126	0.981777	0.759109	1.26976	1.08415	0.836442	1.4052
4.53114	0.981884	0.759787	1.2689	1.0841	0.837062	1.40404
4.50103	0.981992	0.760469	1.26804	1.08405	0.837685	1.40286
4.56674	0.981758	0.758986	1.26992	1.08415	0.836329	1.40542
4.54483	0.981835	0.759478	1.26929	1.08412	0.836779	1.40457
4.56947	0.981748	0.758925	1.26999	1.08416	0.836273	1.40552
4.53662	0.981865	0.759664	1.26906	1.08411	0.836949	1.40425
4.99384	0.980324	0.749794	1.28173	1.08478	0.827844	1.42147
4.97467	0.980385	0.750191	1.28122	1.08476	0.828213	1.42077
4.9692	0.980403	0.750304	1.28107	1.08475	0.828318	1.42057
4.95277	0.980456	0.750645	1.28062	1.08473	0.828636	1.41996
5.03217	0.980203	0.749007	1.28276	1.08483	0.82711	1.42286
4.98836	0.980342	0.749907	1.28158	1.08478	0.827949	1.42127
4.89254	0.98065	0.751905	1.27898	1.08464	0.829806	1.41775
4.94456	0.980482	0.750816	1.2804	1.08472	0.828794	1.41966
4.94182	0.980491	0.750873	1.28033	1.08471	0.828847	1.41956
4.48734	0.982042	0.760781	1.26765	1.08402	0.837969	1.40233
4.95825	0.980438	0.750531	1.28077	1.08473	0.82853	1.42017
4.48186	0.982062	0.760906	1.2675	1.08401	0.838082	1.40211
4.96372	0.98042	0.750418	1.28092	1.08474	0.828424	1.42037
4.54209	0.981845	0.75954	1.26922	1.08411	0.836836	1.40446
4.9692	0.980403	0.750304	1.28107	1.08475	0.828318	1.42057
4.50103	0.981992	0.760469	1.26804	1.08405	0.837685	1.40286
4.92813	0.980535	0.751159	1.27995	1.08469	0.829113	1.41906
4.9692	0.980403	0.750304	1.28107	1.08475	0.828318	1.42057
5.00205	0.980298	0.749625	1.28195	1.08479	0.827687	1.42177
4.9117	0.980588	0.751503	1.27951	1.08467	0.829432	1.41845
4.49555	0.982012	0.760594	1.26789	1.08404	0.837798	1.40265
4.53388	0.981874	0.759725	1.26898	1.0841	0.837005	1.40414
4.99658	0.980316	0.749738	1.28181	1.08479	0.827792	1.42157
4.87885	0.980695	0.752194	1.27861	1.08463	0.830073	1.41724
4.95551	0.980447	0.750588	1.2807	1.08473	0.828583	1.42007
4.91718	0.98057	0.751388	1.27966	1.08468	0.829326	1.41866
4.82957	0.980857	0.753239	1.27726	1.08456	0.831041	1.41541
4.93087	0.980526	0.751102	1.28003	1.0847	0.82906	1.41916
4.96372	0.98042	0.750418	1.28092	1.08474	0.828424	1.42037
4.85969	0.980758	0.752599	1.27809	1.0846	0.830449	1.41653
4.95003	0.980464	0.750702	1.28055	1.08472	0.828688	1.41986
4.90623	0.980606	0.751618	1.27936	1.08466	0.829539	1.41825
4.95551	0.980447	0.750588	1.2807	1.08473	0.828583	1.42007
4.89802	0.980633	0.75179	1.27913	1.08465	0.829699	1.41795
4.95277	0.980456	0.750645	1.28062	1.08473	0.828636	1.41996
4.97467	0.980385	0.750191	1.28122	1.08476	0.828213	1.42077
4.97467	0.980385	0.750191	1.28122	1.08476	0.828213	1.42077
4.9473	0.980473	0.750759	1.28047	1.08472	0.828741	1.41976
4.89802	0.980633	0.75179	1.27913	1.08465	0.829699	1.41795
4.92813	0.980535	0.751159	1.27995	1.08469	0.829113	1.41906
4.4846	0.982052	0.760843	1.26757	1.08402	0.838025	1.40222
4.95551	0.980447	0.750588	1.2807	1.08473	0.828583	1.42007
4.90075	0.980624	0.751733	1.27921	1.08466	0.829645	1.41805
4.84873	0.980794	0.752831	1.27779	1.08458	0.830664	1.41612
4.93361	0.980517	0.751044	1.2801	1.0847	0.829007	1.41926
4.49008	0.982032	0.760719	1.26773	1.08403	0.837912	1.40243
4.83778	0.98083	0.753064	1.27748	1.08457	0.830879	1.41571
4.93634	0.980508	0.750987	1.28018	1.0847	0.828954	1.41936
4.9117	0.980588	0.751503	1.27951	1.08467	0.829432	1.41845
4.85421	0.980776	0.752715	1.27794	1.08459	0.830556	1.41632
4.82136	0.980884	0.753414	1.27703	1.08454	0.831203	1.4151
4.93361	0.980517	0.751044	1.2801	1.0847	0.829007	1.41926
4.95277	0.980456	0.750645	1.28062	1.08473	0.828636	1.41996
4.90897	0.980597	0.75156	1.27943	1.08467	0.829485	1.41835
4.93361	0.980517	0.751044	1.2801	1.0847	0.829007	1.41926
4.85969	0.980758	0.752599	1.27809	1.0846	0.830449	1.41653
5.88638	0.977767	0.732885	1.30447	1.08576	0.811877	1.45203
4.71732	0.981234	0.755657	1.27415	1.08439	0.833273	1.41118
4.87611	0.980704	0.752252	1.27854	1.08462	0.830127	1.41714
6.52704	0.976183	0.722218	1.31945	1.08633	0.801666	1.47207
4.85147	0.980785	0.752773	1.27786	1.08459	0.83061	1.41622
4.83778	0.98083	0.753064	1.27748	1.08457	0.830879	1.41571
4.85695	0.980767	0.752657	1.27801	1.08459	0.830502	1.41643
4.87885	0.980695	0.752194	1.27861	1.08463	0.830073	1.41724
4.8898	0.980659	0.751963	1.27891	1.08464	0.829859	1.41764
4.85695	0.980767	0.752657	1.27801	1.08459	0.830502	1.41643
4.84873	0.980794	0.752831	1.27779	1.08458	0.830664	1.41612
4.85695	0.980767	0.752657	1.27801	1.08459	0.830502	1.41643
4.85969	0.980758	0.752599	1.27809	1.0846	0.830449	1.41653
4.87611	0.980704	0.752252	1.27854	1.08462	0.830127	1.41714
4.85421	0.980776	0.752715	1.27794	1.08459	0.830556	1.41632
4.79671	0.980966	0.753941	1.27635	1.08451	0.83169	1.41418
4.89528	0.980641	0.751848	1.27906	1.08465	0.829752	1.41785
4.74196	0.981151	0.755122	1.27484	1.08443	0.83278	1.41212
4.5859	0.98169	0.758557	1.27046	1.08419	0.835936	1.40616
4.85421	0.980776	0.752715	1.27794	1.08459	0.830556	1.41632
4.87885	0.980695	0.752194	1.27861	1.08463	0.830073	1.41724
4.82136	0.980884	0.753414	1.27703	1.08454	0.831203	1.4151
6.5243	0.97619	0.722262	1.31939	1.08633	0.801707	1.47199
4.86242	0.980749	0.752541	1.27816	1.0846	0.830395	1.41663
4.8679	0.980731	0.752425	1.27831	1.08461	0.830287	1.41683
4.87064	0.980722	0.752367	1.27839	1.08461	0.830234	1.41693
4.87885	0.980695	0.752194	1.27861	1.08463	0.830073	1.41724
4.83504	0.980839	0.753122	1.27741	1.08456	0.830933	1.41561
5.45106	0.97895	0.740774	1.2937	1.08533	0.819379	1.4376
4.79945	0.980957	0.753882	1.27643	1.08451	0.831636	1.41428
4.81314	0.980912	0.753589	1.27681	1.08453	0.831365	1.41479
6.5243	0.97619	0.722262	1.31939	1.08633	0.801707	1.47199
4.39699	0.982373	0.762857	1.26506	1.08387	0.839858	1.39877
4.85421	0.980776	0.752715	1.27794	1.08459	0.830556	1.41632
4.86242	0.980749	0.752541	1.27816	1.0846	0.830395	1.41663
4.81862	0.980894	0.753472	1.27696	1.08454	0.831257	1.415
4.81314	0.980912	0.753589	1.27681	1.08453	0.831365	1.41479
4.70089	0.98129	0.756016	1.27369	1.08437	0.833603	1.41056
4.8898	0.980659	0.751963	1.27891	1.08464	0.829859	1.41764
4.85421	0.980776	0.752715	1.27794	1.08459	0.830556	1.41632
4.71732	0.981234	0.755657	1.27415	1.08439	0.833273	1.41118
4.89254	0.98065	0.751905	1.27898	1.08464	0.829806	1.41775
4.85421	0.980776	0.752715	1.27794	1.08459	0.830556	1.41632
5.79603	0.978005	0.734476	1.30228	1.08567	0.813394	1.4491
4.85421	0.980776	0.752715	1.27794	1.08459	0.830556	1.41632
4.84873	0.980794	0.752831	1.27779	1.08458	0.830664	1.41612
5.00205	0.980298	0.749625	1.28195	1.08479	0.827687	1.42177
4.8104	0.980921	0.753648	1.27673	1.08453	0.831419	1.41469
4.85421	0.980776	0.752715	1.27794	1.08459	0.830556	1.41632
4.86242	0.980749	0.752541	1.27816	1.0846	0.830395	1.41663
4.87885	0.980695	0.752194	1.27861	1.08463	0.830073	1.41724
4.85421	0.980776	0.752715	1.27794	1.08459	0.830556	1.41632
4.74196	0.981151	0.755122	1.27484	1.08443	0.83278	1.41212
4.85421	0.980776	0.752715	1.27794	1.08459	0.830556	1.41632
5.81793	0.977947	0.734088	1.30281	1.08569	0.813025	1.44981
4.83778	0.98083	0.753064	1.27748	1.08457	0.830879	1.41571
4.87611	0.980704	0.752252	1.27854	1.08462	0.830127	1.41714
4.85969	0.980758	0.752599	1.27809	1.0846	0.830449	1.41653
4.71732	0.981234	0.755657	1.27415	1.08439	0.833273	1.41118
4.87064	0.980722	0.752367	1.27839	1.08461	0.830234	1.41693
4.89528	0.980641	0.751848	1.27906	1.08465	0.829752	1.41785
2.22313	0.994449	0.822579	1.20223	1.07672	0.888402	1.30497
4.87885	0.980695	0.752194	1.27861	1.08463	0.830073	1.41724
4.85695	0.980767	0.752657	1.27801	1.08459	0.830502	1.41643
4.85695	0.980767	0.752657	1.27801	1.08459	0.830502	1.41643
4.70089	0.98129	0.756016	1.27369	1.08437	0.833603	1.41056
4.46817	0.982111	0.761218	1.2671	1.08399	0.838367	1.40158
4.91992	0.980561	0.751331	1.27973	1.08468	0.829272	1.41876
4.49008	0.982032	0.760719	1.26773	1.08403	0.837912	1.40243
4.87064	0.980722	0.752367	1.27839	1.08461	0.830234	1.41693
4.9117	0.980588	0.751503	1.27951	1.08467	0.829432	1.41845
4.91992	0.980561	0.751331	1.27973	1.08468	0.829272	1.41876
4.83504	0.980839	0.753122	1.27741	1.08456	0.830933	1.41561
4.84052	0.980821	0.753006	1.27756	1.08457	0.830825	1.41581
4.84052	0.980821	0.753006	1.27756	1.08457	0.830825	1.41581
4.89528	0.980641	0.751848	1.27906	1.08465	0.829752	1.41785
4.91718	0.98057	0.751388	1.27966	1.08468	0.829326	1.41866
4.74196	0.981151	0.755122	1.27484	1.08443	0.83278	1.41212
4.91444	0.980579	0.751445	1.27958	1.08467	0.829379	1.41856
4.87885	0.980695	0.752194	1.27861	1.08463	0.830073	1.41724
4.88706	0.980668	0.752021	1.27883	1.08464	0.829913	1.41754
4.45175	0.982171	0.761595	1.26663	1.08396	0.83871	1.40093
4.90897	0.980597	0.75156	1.27943	1.08467	0.829485	1.41835
4.89528	0.980641	0.751848	1.27906	1.08465	0.829752	1.41785
4.85695	0.980767	0.752657	1.27801	1.08459	0.830502	1.41643
4.89528	0.980641	0.751848	1.27906	1.08465	0.829752	1.41785
4.75291	0.981114	0.754885	1.27514	1.08444	0.832561	1.41253
4.89254	0.98065	0.751905	1.27898	1.08464	0.829806	1.41775
4.91718	0.98057	0.751388	1.27966	1.08468	0.829326	1.41866
4.84052	0.980821	0.753006	1.27756	1.08457	0.830825	1.41581
6.50513	0.976235	0.722566	1.31896	1.08631	0.802	1.47141
4.85695	0.980767	0.752657	1.27801	1.08459	0.830502	1.41643
4.93634	0.980508	0.750987	1.28018	1.0847	0.828954	1.41936
4.9117	0.980588	0.751503	1.27951	1.08467	0.829432	1.41845
4.91718	0.98057	0.751388	1.27966	1.08468	0.829326	1.41866
4.90623	0.980606	0.751618	1.27936	1.08466	0.829539	1.41825
4.87885	0.980695	0.752194	1.27861	1.08463	0.830073	1.41724
4.87885	0.980695	0.752194	1.27861	1.08463	0.830073	1.41724
4.86242	0.980749	0.752541	1.27816	1.0846	0.830395	1.41663
4.93634	0.980508	0.750987	1.28018	1.0847	0.828954	1.41936
6.50787	0.976228	0.722523	1.31902	1.08631	0.801958	1.47149
4.84052	0.980821	0.753006	1.27756	1.08457	0.830825	1.41581
4.70637	0.981272	0.755896	1.27384	1.08437	0.833493	1.41077
4.82957	0.980857	0.753239	1.27726	1.08456	0.831041	1.41541
4.8679	0.980731	0.752425	1.27831	1.08461	0.830287	1.41683
4.34223	0.982577	0.764133	1.26347	1.08377	0.841015	1.3966
4.6872	0.981337	0.756315	1.27331	1.08434	0.833879	1.41004
4.55305	0.981806	0.759294	1.26953	1.08413	0.83661	1.40489
4.8104	0.980921	0.753648	1.27673	1.08453	0.831419	1.41469
4.73922	0.98116	0.755181	1.27476	1.08442	0.832835	1.41201
4.83504	0.980839	0.753122	1.27741	1.08456	0.830933	1.41561
4.80493	0.980939	0.753765	1.27658	1.08452	0.831528	1.41449
4.86516	0.98074	0.752483	1.27824	1.08461	0.830341	1.41673
4.83778	0.98083	0.753064	1.27748	1.08457	0.830879	1.41571
4.85421	0.980776	0.752715	1.27794	1.08459	0.830556	1.41632
5.3744	0.97917	0.74223	1.29175	1.08525	0.820755	1.43497
4.79671	0.980966	0.753941	1.27635	1.08451	0.83169	1.41418
4.85969	0.980758	0.752599	1.27809	1.0846	0.830449	1.41653
4.79398	0.980976	0.754	1.27628	1.0845	0.831744	1.41407
4.80493	0.980939	0.753765	1.27658	1.08452	0.831528	1.41449
4.82957	0.980857	0.753239	1.27726	1.08456	0.831041	1.41541
4.82957	0.980857	0.753239	1.27726	1.08456	0.831041	1.41541
4.8104	0.980921	0.753648	1.27673	1.08453	0.831419	1.41469
4.82957	0.980857	0.753239	1.27726	1.08456	0.831041	1.41541
4.85695	0.980767	0.752657	1.27801	1.08459	0.830502	1.41643
4.83504	0.980839	0.753122	1.27741	1.08456	0.830933	1.41561
4.74196	0.981151	0.755122	1.27484	1.08443	0.83278	1.41212
4.85695	0.980767	0.752657	1.27801	1.08459	0.830502	1.41643
4.85147	0.980785	0.752773	1.27786	1.08459	0.83061	1.41622
4.70363	0.981281	0.755956	1.27377	1.08437	0.833548	1.41066
4.81314	0.980912	0.753589	1.27681	1.08453	0.831365	1.41479
4.84873	0.980794	0.752831	1.27779	1.08458	0.830664	1.41612
4.87611	0.980704	0.752252	1.27854	1.08462	0.830127	1.41714
4.87064	0.980722	0.752367	1.27839	1.08461	0.830234	1.41693
4.94456	0.980482	0.750816	1.2804	1.08472	0.828794	1.41966
4.85969	0.980758	0.752599	1.27809	1.0846	0.830449	1.41653
4.87337	0.980713	0.752309	1.27846	1.08462	0.83018	1.41704
4.62971	0.981536	0.757582	1.2717	1.08425	0.835043	1.40784
4.87611	0.980704	0.752252	1.27854	1.08462	0.830127	1.41714
5.3525	0.979233	0.742651	1.29118	1.08522	0.821151	1.43421
4.71184	0.981253	0.755777	1.274	1.08438	0.833383	1.41098
4.88706	0.980668	0.752021	1.27883	1.08464	0.829913	1.41754
4.89254	0.98065	0.751905	1.27898	1.08464	0.829806	1.41775
4.95003	0.980464	0.750702	1.28055	1.08472	0.828688	1.41986
4.83231	0.980848	0.75318	1.27733	1.08456	0.830987	1.41551
4.43806	0.982221	0.761909	1.26624	1.08394	0.838996	1.40039
4.49008	0.982032	0.760719	1.26773	1.08403	0.837912	1.40243
4.9117	0.980588	0.751503	1.27951	1.08467	0.829432	1.41845
4.84052	0.980821	0.753006	1.27756	1.08457	0.830825	1.41581
5.89185	0.977753	0.73279	1.3046	1.08576	0.811786	1.45221
4.84873	0.980794	0.752831	1.27779	1.08458	0.830664	1.41612
4.68994	0.981328	0.756255	1.27339	1.08435	0.833824	1.41014
4.90623	0.980606	0.751618	1.27936	1.08466	0.829539	1.41825
4.8898	0.980659	0.751963	1.27891	1.08464	0.829859	1.41764
4.91718	0.98057	0.751388	1.27966	1.08468	0.829326	1.41866
4.76112	0.981086	0.754707	1.27537	1.08446	0.832397	1.41284
4.87337	0.980713	0.752309	1.27846	1.08462	0.83018	1.41704
4.91718	0.98057	0.751388	1.27966	1.08468	0.829326	1.41866
4.49555	0.982012	0.760594	1.26789	1.08404	0.837798	1.40265
4.53114	0.981884	0.759787	1.2689	1.0841	0.837062	1.40404
4.87611	0.980704	0.752252	1.27854	1.08462	0.830127	1.41714
4.87611	0.980704	0.752252	1.27854	1.08462	0.830127	1.41714
4.8898	0.980659	0.751963	1.27891	1.08464	0.829859	1.41764
6.51882	0.976202	0.722349	1.31927	1.08632	0.801791	1.47182
4.8679	0.980731	0.752425	1.27831	1.08461	0.830287	1.41683
4.83504	0.980839	0.753122	1.27741	1.08456	0.830933	1.41561
3.5729	0.985814	0.783472	1.24041	1.0821	0.858128	1.36453
4.88159	0.980686	0.752136	1.27869	1.08463	0.83002	1.41734
4.86242	0.980749	0.752541	1.27816	1.0846	0.830395	1.41663
4.85695	0.980767	0.752657	1.27801	1.08459	0.830502	1.41643
4.44627	0.982191	0.76172	1.26648	1.08395	0.838824	1.40072
4.87885	0.980695	0.752194	1.27861	1.08463	0.830073	1.41724
4.85695	0.980767	0.752657	1.27801	1.08459	0.830502	1.41643
4.86242	0.980749	0.752541	1.27816	1.0846	0.830395	1.41663
4.45175	0.982171	0.761595	1.26663	1.08396	0.83871	1.40093
4.45448	0.982161	0.761532	1.26671	1.08397	0.838653	1.40104
4.48734	0.982042	0.760781	1.26765	1.08402	0.837969	1.40233
4.83231	0.980848	0.75318	1.27733	1.08456	0.830987	1.41551
4.8679	0.980731	0.752425	1.27831	1.08461	0.830287	1.41683
4.90897	0.980597	0.75156	1.27943	1.08467	0.829485	1.41835
4.85695	0.980767	0.752657	1.27801	1.08459	0.830502	1.41643
0.0465435	1.03131	0.698994	1.52161	1.07801	0.726338	1.59995
4.93361	0.980517	0.751044	1.2801	1.0847	0.829007	1.41926
4.85969	0.980758	0.752599	1.27809	1.0846	0.830449	1.41653
4.69541	0.981309	0.756135	1.27354	1.08436	0.833713	1.41035
4.81314	0.980912	0.753589	1.27681	1.08453	0.831365	1.41479
4.85421	0.980776	0.752715	1.27794	1.08459	0.830556	1.41632
4.85969	0.980758	0.752599	1.27809	1.0846	0.830449	1.41653
4.72553	0.981206	0.755478	1.27438	1.0844	0.833109	1.4115
4.64613	0.981479	0.757219	1.27216	1.08428	0.834709	1.40847
4.83778	0.98083	0.753064	1.27748	1.08457	0.830879	1.41571
4.63244	0.981527	0.757521	1.27177	1.08426	0.834987	1.40795
4.83231	0.980848	0.75318	1.27733	1.08456	0.830987	1.41551
4.82957	0.980857	0.753239	1.27726	1.08456	0.831041	1.41541
4.45175	0.982171	0.761595	1.26663	1.08396	0.83871	1.40093
4.73922	0.98116	0.755181	1.27476	1.08442	0.832835	1.41201
6.48049	0.976293	0.722959	1.3184	1.08629	0.802377	1.47066
4.82957	0.980857	0.753239	1.27726	1.08456	0.831041	1.41541
4.85421	0.980776	0.752715	1.27794	1.08459	0.830556	1.41632
4.87064	0.980722	0.752367	1.27839	1.08461	0.830234	1.41693
4.71732	0.981234	0.755657	1.27415	1.08439	0.833273	1.41118
4.84052	0.980821	0.753006	1.27756	1.08457	0.830825	1.41581
4.70089	0.98129	0.756016	1.27369	1.08437	0.833603	1.41056
4.82136	0.980884	0.753414	1.27703	1.08454	0.831203	1.4151
4.81588	0.980903	0.753531	1.27688	1.08454	0.831311	1.4149
4.86242	0.980749	0.752541	1.27816	1.0846	0.830395	1.41663
4.60233	0.981632	0.75819	1.27092	1.08421	0.8356	1.40679
4.83778	0.98083	0.753064	1.27748	1.08457	0.830879	1.41571
5.14716	0.979846	0.746679	1.28583	1.08498	0.824935	1.427
4.81862	0.980894	0.753472	1.27696	1.08454	0.831257	1.415
4.60233	0.981632	0.75819	1.27092	1.08421	0.8356	1.40679
4.53114	0.981884	0.759787	1.2689	1.0841	0.837062	1.40404
4.79671	0.980966	0.753941	1.27635	1.08451	0.83169	1.41418
4.82409	0.980875	0.753356	1.27711	1.08455	0.831149	1.4152
4.73922	0.98116	0.755181	1.27476	1.08442	0.832835	1.41201
4.76112	0.981086	0.754707	1.27537	1.08446	0.832397	1.41284
4.74743	0.981132	0.755003	1.27499	1.08444	0.83267	1.41232
4.73648	0.981169	0.755241	1.27468	1.08442	0.832889	1.41191
4.73648	0.981169	0.755241	1.27468	1.08442	0.832889	1.41191
4.72279	0.981216	0.755538	1.2743	1.0844	0.833163	1.41139
4.74196	0.981151	0.755122	1.27484	1.08443	0.83278	1.41212
4.73922	0.98116	0.755181	1.27476	1.08442	0.832835	1.41201
4.73374	0.981178	0.7553	1.27461	1.08441	0.832944	1.41181
4.27926	0.982816	0.765617	1.26163	1.08366	0.842356	1.39408
4.73648	0.981169	0.755241	1.27468	1.08442	0.832889	1.41191
0.966461	1.01024	0.822391	1.24101	1.06784	0.867698	1.31416
4.74743	0.981132	0.755003	1.27499	1.08444	0.83267	1.41232
4.66804	0.981403	0.756736	1.27277	1.08431	0.834266	1.40931
4.77207	0.981049	0.754471	1.27567	1.08447	0.832179	1.41325
4.73922	0.98116	0.755181	1.27476	1.08442	0.832835	1.41201
4.73922	0.98116	0.755181	1.27476	1.08442	0.832835	1.41201
5.70294	0.978253	0.736138	1.3	1.08558	0.814978	1.44604
4.62697	0.981546	0.757643	1.27162	1.08425	0.835098	1.40774
4.72005	0.981225	0.755598	1.27423	1.08439	0.833218	1.41129
4.73922	0.98116	0.755181	1.27476	1.08442	0.832835	1.41201
4.71458	0.981244	0.755717	1.27407	1.08439	0.833328	1.41108
4.72827	0.981197	0.755419	1.27446	1.08441	0.833054	1.4116
5.58795	0.978566	0.738227	1.29715	1.08547	0.816965	1.44223
4.82136	0.980884	0.753414	1.27703	1.08454	0.831203	1.4151
6.42847	0.976416	0.723793	1.31721	1.08624	0.803178	1.46907
4.73922	0.98116	0.755181	1.27476	1.08442	0.832835	1.41201
4.72553	0.981206	0.755478	1.27438	1.0844	0.833109	1.4115
4.66804	0.981403	0.756736	1.27277	1.08431	0.834266	1.40931
4.72279	0.981216	0.755538	1.2743	1.0844	0.833163	1.41139
4.69541	0.981309	0.756135	1.27354	1.08436	0.833713	1.41035
4.81314	0.980912	0.753589	1.27681	1.08453	0.831365	1.41479
4.70637	0.981272	0.755896	1.27384	1.08437	0.833493	1.41077
4.72279	0.981216	0.755538	1.2743	1.0844	0.833163	1.41139
4.6078	0.981613	0.758068	1.27108	1.08422	0.835489	1.407
4.7447	0.981141	0.755062	1.27491	1.08443	0.832725	1.41222
4.73374	0.981178	0.7553	1.27461	1.08441	0.832944	1.41181
5.05133	0.980143	0.748615	1.28328	1.08486	0.826745	1.42355
4.75565	0.981104	0.754825	1.27522	1.08445	0.832507	1.41263
4.7447	0.981141	0.755062	1.27491	1.08443	0.832725	1.41222
4.64887	0.98147	0.757158	1.27223	1.08428	0.834654	1.40858
4.72279	0.981216	0.755538	1.2743	1.0844	0.833163	1.41139
4.7447	0.981141	0.755062	1.27491	1.08443	0.832725	1.41222
4.72279	0.981216	0.755538	1.2743	1.0844	0.833163	1.41139
4.69268	0.981319	0.756195	1.27346	1.08435	0.833768	1.41025
4.70363	0.981281	0.755956	1.27377	1.08437	0.833548	1.41066
4.72279	0.981216	0.755538	1.2743	1.0844	0.833163	1.41139
4.73922	0.98116	0.755181	1.27476	1.08442	0.832835	1.41201
4.72279	0.981216	0.755538	1.2743	1.0844	0.833163	1.41139
4.85147	0.980785	0.752773	1.27786	1.08459	0.83061	1.41622
4.66804	0.981403	0.756736	1.27277	1.08431	0.834266	1.40931
4.6872	0.981337	0.756315	1.27331	1.08434	0.833879	1.41004
4.65982	0.981432	0.756917	1.27254	1.0843	0.834432	1.409
4.69541	0.981309	0.756135	1.27354	1.08436	0.833713	1.41035
4.72553	0.981206	0.755478	1.27438	1.0844	0.833109	1.4115
4.72005	0.981225	0.755598	1.27423	1.08439	0.833218	1.41129
4.73648	0.981169	0.755241	1.27468	1.08442	0.832889	1.41191
4.70089	0.98129	0.756016	1.27369	1.08437	0.833603	1.41056
4.62971	0.981536	0.757582	1.2717	1.08425	0.835043	1.40784
4.69541	0.981309	0.756135	1.27354	1.08436	0.833713	1.41035
4.63244	0.981527	0.757521	1.27177	1.08426	0.834987	1.40795
4.70089	0.98129	0.756016	1.27369	1.08437	0.833603	1.41056
4.6872	0.981337	0.756315	1.27331	1.08434	0.833879	1.41004
4.7447	0.981141	0.755062	1.27491	1.08443	0.832725	1.41222
4.58864	0.98168	0.758496	1.27054	1.08419	0.83588	1.40626
4.56126	0.981777	0.759109	1.26976	1.08415	0.836442	1.4052
4.68172	0.981356	0.756435	1.27316	1.08434	0.833989	1.40983
4.71732	0.981234	0.755657	1.27415	1.08439	0.833273	1.41118
4.69815	0.9813	0.756075	1.27362	1.08436	0.833658	1.41046
4.45996	0.982141	0.761406	1.26687	1.08398	0.838538	1.40125
4.73648	0.981169	0.755241	1.27468	1.08442	0.832889	1.41191
4.69815	0.9813	0.756075	1.27362	1.08436	0.833658	1.41046
4.89528	0.980641	0.751848	1.27906	1.08465	0.829752	1.41785
5.09788	0.979998	0.74767	1.28452	1.08492	0.825863	1.42523
4.66256	0.981422	0.756856	1.27262	1.08431	0.834376	1.4091
4.69815	0.9813	0.756075	1.27362	1.08436	0.833658	1.41046
4.62971	0.981536	0.757582	1.2717	1.08425	0.835043	1.40784
4.70363	0.981281	0.755956	1.27377	1.08437	0.833548	1.41066
6.34908	0.976607	0.725079	1.31539	1.08618	0.804411	1.46663
4.69541	0.981309	0.756135	1.27354	1.08436	0.833713	1.41035
4.69541	0.981309	0.756135	1.27354	1.08436	0.833713	1.41035
6.4011	0.976482	0.724235	1.31658	1.08622	0.803601	1.46823
4.71184	0.981253	0.755777	1.274	1.08438	0.833383	1.41098
4.67625	0.981375	0.756555	1.273	1.08433	0.8341	1.40962
4.72279	0.981216	0.755538	1.2743	1.0844	0.833163	1.41139
4.70637	0.981272	0.755896	1.27384	1.08437	0.833493	1.41077
4.6872	0.981337	0.756315	1.27331	1.08434	0.833879	1.41004
4.72553	0.981206	0.755478	1.27438	1.0844	0.833109	1.4115
4.70637	0.981272	0.755896	1.27384	1.08437	0.833493	1.41077
4.72553	0.981206	0.755478	1.27438	1.0844	0.833109	1.4115
4.72827	0.981197	0.755419	1.27446	1.08441	0.833054	1.4116
4.70363	0.981281	0.755956	1.27377	1.08437	0.833548	1.41066
4.70637	0.981272	0.755896	1.27384	1.08437	0.833493	1.41077
4.6872	0.981337	0.756315	1.27331	1.08434	0.833879	1.41004
4.79398	0.980976	0.754	1.27628	1.0845	0.831744	1.41407
4.64887	0.98147	0.757158	1.27223	1.08428	0.834654	1.40858
4.72279	0.981216	0.755538	1.2743	1.0844	0.833163	1.41139
4.81314	0.980912	0.753589	1.27681	1.08453	0.831365	1.41479
4.72279	0.981216	0.755538	1.2743	1.0844	0.833163	1.41139
4.79398	0.980976	0.754	1.27628	1.0845	0.831744	1.41407
4.81314	0.980912	0.753589	1.27681	1.08453	0.831365	1.41479
4.73922	0.98116	0.755181	1.27476	1.08442	0.832835	1.41201
4.75565	0.981104	0.754825	1.27522	1.08445	0.832507	1.41263
4.80493	0.980939	0.753765	1.27658	1.08452	0.831528	1.41449
4.72279	0.981216	0.755538	1.2743	1.0844	0.833163	1.41139
4.67899	0.981366	0.756495	1.27308	1.08433	0.834044	1.40973
4.66256	0.981422	0.756856	1.27262	1.08431	0.834376	1.4091
4.66804	0.981403	0.756736	1.27277	1.08431	0.834266	1.40931
4.72279	0.981216	0.755538	1.2743	1.0844	0.833163	1.41139
4.72553	0.981206	0.755478	1.27438	1.0844	0.833109	1.4115
4.71732	0.981234	0.755657	1.27415	1.08439	0.833273	1.41118
4.62149	0.981565	0.757764	1.27146	1.08424	0.83521	1.40753
3.90965	0.984307	0.774686	1.25065	1.08291	0.850457	1.37889
4.72279	0.981216	0.755538	1.2743	1.0844	0.833163	1.41139
4.72005	0.981225	0.755598	1.27423	1.08439	0.833218	1.41129
4.72005	0.981225	0.755598	1.27423	1.08439	0.833218	1.41129
4.72005	0.981225	0.755598	1.27423	1.08439	0.833218	1.41129
2.61191	0.991279	0.81091	1.21177	1.07878	0.880383	1.3219
4.7447	0.981141	0.755062	1.27491	1.08443	0.832725	1.41222
4.74196	0.981151	0.755122	1.27484	1.08443	0.83278	1.41212
4.63244	0.981527	0.757521	1.27177	1.08426	0.834987	1.40795
4.74743	0.981132	0.755003	1.27499	1.08444	0.83267	1.41232
4.74743	0.981132	0.755003	1.27499	1.08444	0.83267	1.41232
4.72827	0.981197	0.755419	1.27446	1.08441	0.833054	1.4116
4.71732	0.981234	0.755657	1.27415	1.08439	0.833273	1.41118
4.69815	0.9813	0.756075	1.27362	1.08436	0.833658	1.41046
4.73374	0.981178	0.7553	1.27461	1.08441	0.832944	1.41181
4.73374	0.981178	0.7553	1.27461	1.08441	0.832944	1.41181
4.72279	0.981216	0.755538	1.2743	1.0844	0.833163	1.41139
4.6653	0.981413	0.756796	1.2727	1.08431	0.834321	1.40921
4.70637	0.981272	0.755896	1.27384	1.08437	0.833493	1.41077
4.69541	0.981309	0.756135	1.27354	1.08436	0.833713	1.41035
4.54209	0.981845	0.75954	1.26922	1.08411	0.836836	1.40446
4.61054	0.981603	0.758008	1.27115	1.08422	0.835433	1.40711
4.71732	0.981234	0.755657	1.27415	1.08439	0.833273	1.41118
4.69815	0.9813	0.756075	1.27362	1.08436	0.833658	1.41046
4.67077	0.981394	0.756676	1.27285	1.08432	0.83421	1.40941
4.71458	0.981244	0.755717	1.27407	1.08439	0.833328	1.41108
4.71732	0.981234	0.755657	1.27415	1.08439	0.833273	1.41118
4.68446	0.981347	0.756375	1.27323	1.08434	0.833934	1.40994
4.70363	0.981281	0.755956	1.27377	1.08437	0.833548	1.41066
4.70363	0.981281	0.755956	1.27377	1.08437	0.833548	1.41066
4.70363	0.981281	0.755956	1.27377	1.08437	0.833548	1.41066
4.73374	0.981178	0.7553	1.27461	1.08441	0.832944	1.41181
4.7091	0.981262	0.755836	1.27392	1.08438	0.833438	1.41087
4.35592	0.982526	0.763813	1.26387	1.0838	0.840724	1.39714
4.70089	0.98129	0.756016	1.27369	1.08437	0.833603	1.41056
4.66256	0.981422	0.756856	1.27262	1.08431	0.834376	1.4091
4.74743	0.981132	0.755003	1.27499	1.08444	0.83267	1.41232
4.6872	0.981337	0.756315	1.27331	1.08434	0.833879	1.41004
4.6872	0.981337	0.756315	1.27331	1.08434	0.833879	1.41004
4.72553	0.981206	0.755478	1.27438	1.0844	0.833109	1.4115
4.82136	0.980884	0.753414	1.27703	1.08454	0.831203	1.4151
4.73648	0.981169	0.755241	1.27468	1.08442	0.832889	1.41191
4.81314	0.980912	0.753589	1.27681	1.08453	0.831365	1.41479
4.73648	0.981169	0.755241	1.27468	1.08442	0.832889	1.41191
0.832307	1.01261	0.815256	1.25774	1.06683	0.857386	1.32744
4.73374	0.981178	0.7553	1.27461	1.08441	0.832944	1.41181
5.64545	0.978409	0.737177	1.29858	1.08553	0.815967	1.44414
4.80493	0.980939	0.753765	1.27658	1.08452	0.831528	1.41449
4.69541	0.981309	0.756135	1.27354	1.08436	0.833713	1.41035
4.72553	0.981206	0.755478	1.27438	1.0844	0.833109	1.4115
4.67899	0.981366	0.756495	1.27308	1.08433	0.834044	1.40973
4.79671	0.980966	0.753941	1.27635	1.08451	0.83169	1.41418
4.62149	0.981565	0.757764	1.27146	1.08424	0.83521	1.40753
4.81314	0.980912	0.753589	1.27681	1.08453	0.831365	1.41479
4.80493	0.980939	0.753765	1.27658	1.08452	0.831528	1.41449
4.37235	0.982464	0.76343	1.26434	1.08382	0.840377	1.3978
4.67899	0.981366	0.756495	1.27308	1.08433	0.834044	1.40973
4.81314	0.980912	0.753589	1.27681	1.08453	0.831365	1.41479
4.74196	0.981151	0.755122	1.27484	1.08443	0.83278	1.41212
4.68994	0.981328	0.756255	1.27339	1.08435	0.833824	1.41014
4.84326	0.980812	0.752947	1.27764	1.08458	0.830771	1.41592
4.74743	0.981132	0.755003	1.27499	1.08444	0.83267	1.41232
4.79671	0.980966	0.753941	1.27635	1.08451	0.83169	1.41418
4.6872	0.981337	0.756315	1.27331	1.08434	0.833879	1.41004
5.34702	0.979249	0.742756	1.29104	1.08522	0.82125	1.43402
4.70637	0.981272	0.755896	1.27384	1.08437	0.833493	1.41077
4.62423	0.981555	0.757703	1.27154	1.08425	0.835154	1.40763
4.69815	0.9813	0.756075	1.27362	1.08436	0.833658	1.41046
4.70089	0.98129	0.756016	1.27369	1.08437	0.833603	1.41056
4.69541	0.981309	0.756135	1.27354	1.08436	0.833713	1.41035
4.70089	0.98129	0.756016	1.27369	1.08437	0.833603	1.41056
4.67351	0.981384	0.756616	1.27293	1.08432	0.834155	1.40952
4.54483	0.981835	0.759478	1.26929	1.08412	0.836779	1.40457
4.70089	0.98129	0.756016	1.27369	1.08437	0.833603	1.41056
4.68994	0.981328	0.756255	1.27339	1.08435	0.833824	1.41014
4.70363	0.981281	0.755956	1.27377	1.08437	0.833548	1.41066
4.69815	0.9813	0.756075	1.27362	1.08436	0.833658	1.41046
4.69815	0.9813	0.756075	1.27362	1.08436	0.833658	1.41046
4.70089	0.98129	0.756016	1.27369	1.08437	0.833603	1.41056
4.69815	0.9813	0.756075	1.27362	1.08436	0.833658	1.41046
4.6872	0.981337	0.756315	1.27331	1.08434	0.833879	1.41004
4.61602	0.981584	0.757886	1.27131	1.08423	0.835321	1.40732
4.67899	0.981366	0.756495	1.27308	1.08433	0.834044	1.40973
4.72005	0.981225	0.755598	1.27423	1.08439	0.833218	1.41129
4.71732	0.981234	0.755657	1.27415	1.08439	0.833273	1.41118
4.73101	0.981188	0.755359	1.27453	1.08441	0.832999	1.4117
4.64613	0.981479	0.757219	1.27216	1.08428	0.834709	1.40847
4.70637	0.981272	0.755896	1.27384	1.08437	0.833493	1.41077
4.6872	0.981337	0.756315	1.27331	1.08434	0.833879	1.41004
4.68446	0.981347	0.756375	1.27323	1.08434	0.833934	1.40994
4.64613	0.981479	0.757219	1.27216	1.08428	0.834709	1.40847
4.68446	0.981347	0.756375	1.27323	1.08434	0.833934	1.40994
4.68172	0.981356	0.756435	1.27316	1.08434	0.833989	1.40983
4.69815	0.9813	0.756075	1.27362	1.08436	0.833658	1.41046
4.72553	0.981206	0.755478	1.27438	1.0844	0.833109	1.4115
4.7091	0.981262	0.755836	1.27392	1.08438	0.833438	1.41087
4.69815	0.9813	0.756075	1.27362	1.08436	0.833658	1.41046
4.68446	0.981347	0.756375	1.27323	1.08434	0.833934	1.40994
4.68446	0.981347	0.756375	1.27323	1.08434	0.833934	1.40994
4.6653	0.981413	0.756796	1.2727	1.08431	0.834321	1.40921
4.54757	0.981826	0.759417	1.26937	1.08412	0.836723	1.40467
4.61054	0.981603	0.758008	1.27115	1.08422	0.835433	1.40711
1.93018	0.99737	0.829892	1.19865	1.07483	0.892104	1.29499
4.6078	0.981613	0.758068	1.27108	1.08422	0.835489	1.407
4.70089	0.98129	0.756016	1.27369	1.08437	0.833603	1.41056
4.66804	0.981403	0.756736	1.27277	1.08431	0.834266	1.40931
4.62697	0.981546	0.757643	1.27162	1.08425	0.835098	1.40774
4.72005	0.981225	0.755598	1.27423	1.08439	0.833218	1.41129
4.70089	0.98129	0.756016	1.27369	1.08437	0.833603	1.41056
4.71732	0.981234	0.755657	1.27415	1.08439	0.833273	1.41118
4.70089	0.98129	0.756016	1.27369	1.08437	0.833603	1.41056
4.73374	0.981178	0.7553	1.27461	1.08441	0.832944	1.41181
4.70089	0.98129	0.756016	1.27369	1.08437	0.833603	1.41056
4.69541	0.981309	0.756135	1.27354	1.08436	0.833713	1.41035
4.70363	0.981281	0.755956	1.27377	1.08437	0.833548	1.41066
4.69541	0.981309	0.756135	1.27354	1.08436	0.833713	1.41035
4.75838	0.981095	0.754766	1.27529	1.08445	0.832452	1.41274
4.73922	0.98116	0.755181	1.27476	1.08442	0.832835	1.41201
4.68994	0.981328	0.756255	1.27339	1.08435	0.833824	1.41014
4.6872	0.981337	0.756315	1.27331	1.08434	0.833879	1.41004
4.70637	0.981272	0.755896	1.27384	1.08437	0.833493	1.41077
4.68446	0.981347	0.756375	1.27323	1.08434	0.833934	1.40994
4.64339	0.981489	0.757279	1.27208	1.08428	0.834765	1.40837
4.68994	0.981328	0.756255	1.27339	1.08435	0.833824	1.41014
4.53936	0.981855	0.759602	1.26914	1.08411	0.836892	1.40435
4.66804	0.981403	0.756736	1.27277	1.08431	0.834266	1.40931
4.62971	0.981536	0.757582	1.2717	1.08425	0.835043	1.40784
5.93292	0.977646	0.732075	1.30559	1.0858	0.811104	1.45353
4.10404	0.983504	0.76984	1.25647	1.08332	0.84615	1.38696
4.6653	0.981413	0.756796	1.2727	1.08431	0.834321	1.40921
4.68446	0.981347	0.756375	1.27323	1.08434	0.833934	1.40994
4.61875	0.981574	0.757825	1.27139	1.08424	0.835265	1.40742
4.59959	0.981642	0.758251	1.27085	1.08421	0.835656	1.40668
6.10267	0.977214	0.729168	1.30964	1.08596	0.808326	1.45894
4.64339	0.981489	0.757279	1.27208	1.08428	0.834765	1.40837
4.68446	0.981347	0.756375	1.27323	1.08434	0.833934	1.40994
4.66804	0.981403	0.756736	1.27277	1.08431	0.834266	1.40931
4.65708	0.981441	0.756977	1.27247	1.0843	0.834487	1.40889
5.4538	0.978942	0.740722	1.29377	1.08533	0.81933	1.43769
4.67625	0.981375	0.756555	1.273	1.08433	0.8341	1.40962
4.62423	0.981555	0.757703	1.27154	1.08425	0.835154	1.40763
4.67899	0.981366	0.756495	1.27308	1.08433	0.834044	1.40973
5.58522	0.978574	0.738277	1.29708	1.08547	0.817013	1.44213
4.67077	0.981394	0.756676	1.27285	1.08432	0.83421	1.40941
5.69199	0.978283	0.736335	1.29973	1.08557	0.815166	1.44568
5.11978	0.97993	0.747228	1.2851	1.08495	0.82545	1.42602
6.38193	0.976528	0.724545	1.31614	1.0862	0.803899	1.46765
6.08624	0.977255	0.729446	1.30925	1.08594	0.808592	1.45843
4.60233	0.981632	0.75819	1.27092	1.08421	0.8356	1.40679
4.69541	0.981309	0.756135	1.27354	1.08436	0.833713	1.41035
4.75017	0.981123	0.754944	1.27506	1.08444	0.832616	1.41243
4.68446	0.981347	0.756375	1.27323	1.08434	0.833934	1.40994
4.60233	0.981632	0.75819	1.27092	1.08421	0.8356	1.40679
4.66804	0.981403	0.756736	1.27277	1.08431	0.834266	1.40931
4.65982	0.981432	0.756917	1.27254	1.0843	0.834432	1.409
4.73648	0.981169	0.755241	1.27468	1.08442	0.832889	1.41191
4.73101	0.981188	0.755359	1.27453	1.08441	0.832999	1.4117
4.61054	0.981603	0.758008	1.27115	1.08422	0.835433	1.40711
4.73922	0.98116	0.755181	1.27476	1.08442	0.832835	1.41201
5.53046	0.978726	0.739288	1.29571	1.08541	0.817972	1.44029
5.29774	0.979394	0.743709	1.28977	1.08516	0.822148	1.43231
4.7091	0.981262	0.755836	1.27392	1.08438	0.833438	1.41087
4.70637	0.981272	0.755896	1.27384	1.08437	0.833493	1.41077
4.73648	0.981169	0.755241	1.27468	1.08442	0.832889	1.41191
4.70089	0.98129	0.756016	1.27369	1.08437	0.833603	1.41056
4.73648	0.981169	0.755241	1.27468	1.08442	0.832889	1.41191
4.64066	0.981498	0.75734	1.272	1.08427	0.83482	1.40826
1.22656	1.00616	0.831225	1.21791	1.06982	0.882017	1.29761
4.68172	0.981356	0.756435	1.27316	1.08434	0.833989	1.40983
4.73101	0.981188	0.755359	1.27453	1.08441	0.832999	1.4117
4.73648	0.981169	0.755241	1.27468	1.08442	0.832889	1.41191
4.51198	0.981953	0.760221	1.26836	1.08406	0.837458	1.40329
2.36824	0.993172	0.818323	1.20538	1.07756	0.885661	1.31104
4.73648	0.981169	0.755241	1.27468	1.08442	0.832889	1.41191
4.74196	0.981151	0.755122	1.27484	1.08443	0.83278	1.41212
4.58864	0.98168	0.758496	1.27054	1.08419	0.83588	1.40626
4.6872	0.981337	0.756315	1.27331	1.08434	0.833879	1.41004
4.65161	0.98146	0.757098	1.27231	1.08429	0.834598	1.40868
4.67077	0.981394	0.756676	1.27285	1.08432	0.83421	1.40941
4.6653	0.981413	0.756796	1.2727	1.08431	0.834321	1.40921
4.63792	0.981508	0.7574	1.27193	1.08427	0.834876	1.40816
5.86721	0.977817	0.733221	1.30401	1.08574	0.812197	1.45141
4.62697	0.981546	0.757643	1.27162	1.08425	0.835098	1.40774
4.64339	0.981489	0.757279	1.27208	1.08428	0.834765	1.40837
4.66256	0.981422	0.756856	1.27262	1.08431	0.834376	1.4091
4.6653	0.981413	0.756796	1.2727	1.08431	0.834321	1.40921
4.68994	0.981328	0.756255	1.27339	1.08435	0.833824	1.41014
4.62149	0.981565	0.757764	1.27146	1.08424	0.83521	1.40753
4.63792	0.981508	0.7574	1.27193	1.08427	0.834876	1.40816
4.6653	0.981413	0.756796	1.2727	1.08431	0.834321	1.40921
4.66256	0.981422	0.756856	1.27262	1.08431	0.834376	1.4091
4.6653	0.981413	0.756796	1.2727	1.08431	0.834321	1.40921
4.64887	0.98147	0.757158	1.27223	1.08428	0.834654	1.40858
4.61054	0.981603	0.758008	1.27115	1.08422	0.835433	1.40711
4.66256	0.981422	0.756856	1.27262	1.08431	0.834376	1.4091
4.65982	0.981432	0.756917	1.27254	1.0843	0.834432	1.409
4.63244	0.981527	0.757521	1.27177	1.08426	0.834987	1.40795
4.55305	0.981806	0.759294	1.26953	1.08413	0.83661	1.40489
4.64066	0.981498	0.75734	1.272	1.08427	0.83482	1.40826
4.62697	0.981546	0.757643	1.27162	1.08425	0.835098	1.40774
4.74743	0.981132	0.755003	1.27499	1.08444	0.83267	1.41232
4.65161	0.98146	0.757098	1.27231	1.08429	0.834598	1.40868
4.65982	0.981432	0.756917	1.27254	1.0843	0.834432	1.409
4.65982	0.981432	0.756917	1.27254	1.0843	0.834432	1.409
1.95756	0.997081	0.829319	1.19878	1.07502	0.891894	1.29574
4.59138	0.981671	0.758435	1.27061	1.08419	0.835824	1.40637
4.69815	0.9813	0.756075	1.27362	1.08436	0.833658	1.41046
5.62081	0.978476	0.737626	1.29797	1.0855	0.816394	1.44332
4.66804	0.981403	0.756736	1.27277	1.08431	0.834266	1.40931
4.66804	0.981403	0.756736	1.27277	1.08431	0.834266	1.40931
4.62697	0.981546	0.757643	1.27162	1.08425	0.835098	1.40774
4.66256	0.981422	0.756856	1.27262	1.08431	0.834376	1.4091
4.66256	0.981422	0.756856	1.27262	1.08431	0.834376	1.4091
4.6653	0.981413	0.756796	1.2727	1.08431	0.834321	1.40921
4.69268	0.981319	0.756195	1.27346	1.08435	0.833768	1.41025
4.66256	0.981422	0.756856	1.27262	1.08431	0.834376	1.4091
4.68172	0.981356	0.756435	1.27316	1.08434	0.833989	1.40983
4.60507	0.981622	0.758129	1.271	1.08422	0.835545	1.4069
6.37372	0.976547	0.724678	1.31596	1.0862	0.804026	1.46739
4.65161	0.98146	0.757098	1.27231	1.08429	0.834598	1.40868
4.58864	0.98168	0.758496	1.27054	1.08419	0.83588	1.40626
4.60507	0.981622	0.758129	1.271	1.08422	0.835545	1.4069
4.65982	0.981432	0.756917	1.27254	1.0843	0.834432	1.409
4.68172	0.981356	0.756435	1.27316	1.08434	0.833989	1.40983
5.87817	0.977789	0.733029	1.30427	1.08575	0.812014	1.45177
4.6872	0.981337	0.756315	1.27331	1.08434	0.833879	1.41004
4.56674	0.981758	0.758986	1.26992	1.08415	0.836329	1.40542
4.65161	0.98146	0.757098	1.27231	1.08429	0.834598	1.40868
4.6078	0.981613	0.758068	1.27108	1.08422	0.835489	1.407
4.65982	0.981432	0.756917	1.27254	1.0843	0.834432	1.409
4.66804	0.981403	0.756736	1.27277	1.08431	0.834266	1.40931
4.68172	0.981356	0.756435	1.27316	1.08434	0.833989	1.40983
6.37098	0.976554	0.724723	1.31589	1.08619	0.804069	1.46731
4.65708	0.981441	0.756977	1.27247	1.0843	0.834487	1.40889
4.61054	0.981603	0.758008	1.27115	1.08422	0.835433	1.40711
4.6653	0.981413	0.756796	1.2727	1.08431	0.834321	1.40921
5.5551	0.978657	0.738832	1.29633	1.08544	0.817539	1.44112
4.6872	0.981337	0.756315	1.27331	1.08434	0.833879	1.41004
4.68172	0.981356	0.756435	1.27316	1.08434	0.833989	1.40983
4.64887	0.98147	0.757158	1.27223	1.08428	0.834654	1.40858
4.65435	0.981451	0.757037	1.27239	1.08429	0.834543	1.40879
4.60233	0.981632	0.75819	1.27092	1.08421	0.8356	1.40679
4.6078	0.981613	0.758068	1.27108	1.08422	0.835489	1.407
4.66804	0.981403	0.756736	1.27277	1.08431	0.834266	1.40931
4.63792	0.981508	0.7574	1.27193	1.08427	0.834876	1.40816
4.68446	0.981347	0.756375	1.27323	1.08434	0.833934	1.40994
4.62149	0.981565	0.757764	1.27146	1.08424	0.83521	1.40753
6.37098	0.976554	0.724723	1.31589	1.08619	0.804069	1.46731
4.66256	0.981422	0.756856	1.27262	1.08431	0.834376	1.4091
6.35181	0.9766	0.725034	1.31545	1.08618	0.804368	1.46672
6.35181	0.9766	0.725034	1.31545	1.08618	0.804368	1.46672
4.6653	0.981413	0.756796	1.2727	1.08431	0.834321	1.40921
5.36893	0.979185	0.742335	1.29161	1.08524	0.820854	1.43478
4.64613	0.981479	0.757219	1.27216	1.08428	0.834709	1.40847
3.8193	0.984697	0.776995	1.24792	1.0827	0.852492	1.37508
4.64613	0.981479	0.757219	1.27216	1.08428	0.834709	1.40847
6.141	0.977118	0.728522	1.31054	1.08599	0.807708	1.46015
4.65161	0.98146	0.757098	1.27231	1.08429	0.834598	1.40868
4.67899	0.981366	0.756495	1.27308	1.08433	0.834044	1.40973
4.60507	0.981622	0.758129	1.271	1.08422	0.835545	1.4069
4.66804	0.981403	0.756736	1.27277	1.08431	0.834266	1.40931
6.34908	0.976607	0.725079	1.31539	1.08618	0.804411	1.46663
5.77413	0.978063	0.734865	1.30175	1.08565	0.813765	1.44838
4.64066	0.981498	0.75734	1.272	1.08427	0.83482	1.40826
4.74743	0.981132	0.755003	1.27499	1.08444	0.83267	1.41232
4.62423	0.981555	0.757703	1.27154	1.08425	0.835154	1.40763
4.72005	0.981225	0.755598	1.27423	1.08439	0.833218	1.41129
5.25941	0.979507	0.744457	1.28877	1.08511	0.822851	1.43097
4.71458	0.981244	0.755717	1.27407	1.08439	0.833328	1.41108
4.73922	0.98116	0.755181	1.27476	1.08442	0.832835	1.41201
5.2512	0.979532	0.744617	1.28856	1.0851	0.823002	1.43068
4.71458	0.981244	0.755717	1.27407	1.08439	0.833328	1.41108
4.70363	0.981281	0.755956	1.27377	1.08437	0.833548	1.41066
4.75565	0.981104	0.754825	1.27522	1.08445	0.832507	1.41263
5.39904	0.979098	0.74176	1.29238	1.08527	0.820311	1.43582
6.31348	0.976693	0.72566	1.31457	1.08614	0.804968	1.46554
4.64339	0.981489	0.757279	1.27208	1.08428	0.834765	1.40837
4.62697	0.981546	0.757643	1.27162	1.08425	0.835098	1.40774
4.63792	0.981508	0.7574	1.27193	1.08427	0.834876	1.40816
4.64339	0.981489	0.757279	1.27208	1.08428	0.834765	1.40837
4.75291	0.981114	0.754885	1.27514	1.08444	0.832561	1.41253
4.63244	0.981527	0.757521	1.27177	1.08426	0.834987	1.40795
4.63518	0.981517	0.757461	1.27185	1.08426	0.834931	1.40805
4.62149	0.981565	0.757764	1.27146	1.08424	0.83521	1.40753
4.60233	0.981632	0.75819	1.27092	1.08421	0.8356	1.40679
4.68994	0.981328	0.756255	1.27339	1.08435	0.833824	1.41014
4.62697	0.981546	0.757643	1.27162	1.08425	0.835098	1.40774
4.65982	0.981432	0.756917	1.27254	1.0843	0.834432	1.409
4.59138	0.981671	0.758435	1.27061	1.08419	0.835824	1.40637
4.564	0.981767	0.759047	1.26984	1.08415	0.836385	1.40531
4.55305	0.981806	0.759294	1.26953	1.08413	0.83661	1.40489
4.61054	0.981603	0.758008	1.27115	1.08422	0.835433	1.40711
4.60233	0.981632	0.75819	1.27092	1.08421	0.8356	1.40679
4.67899	0.981366	0.756495	1.27308	1.08433	0.834044	1.40973
4.6872	0.981337	0.756315	1.27331	1.08434	0.833879	1.41004
4.63244	0.981527	0.757521	1.27177	1.08426	0.834987	1.40795
4.6078	0.981613	0.758068	1.27108	1.08422	0.835489	1.407
4.53936	0.981855	0.759602	1.26914	1.08411	0.836892	1.40435
4.64887	0.98147	0.757158	1.27223	1.08428	0.834654	1.40858
4.67077	0.981394	0.756676	1.27285	1.08432	0.83421	1.40941
4.75838	0.981095	0.754766	1.27529	1.08445	0.832452	1.41274
4.67625	0.981375	0.756555	1.273	1.08433	0.8341	1.40962
4.74196	0.981151	0.755122	1.27484	1.08443	0.83278	1.41212
4.72279	0.981216	0.755538	1.2743	1.0844	0.833163	1.41139
4.72005	0.981225	0.755598	1.27423	1.08439	0.833218	1.41129
4.69541	0.981309	0.756135	1.27354	1.08436	0.833713	1.41035
6.34908	0.976607	0.725079	1.31539	1.08618	0.804411	1.46663
5.8809	0.977782	0.732981	1.30434	1.08575	0.811969	1.45185
4.62697	0.981546	0.757643	1.27162	1.08425	0.835098	1.40774
4.64066	0.981498	0.75734	1.272	1.08427	0.83482	1.40826
4.58864	0.98168	0.758496	1.27054	1.08419	0.83588	1.40626
4.64339	0.981489	0.757279	1.27208	1.08428	0.834765	1.40837
4.63792	0.981508	0.7574	1.27193	1.08427	0.834876	1.40816
4.64339	0.981489	0.757279	1.27208	1.08428	0.834765	1.40837
4.63792	0.981508	0.7574	1.27193	1.08427	0.834876	1.40816
4.67899	0.981366	0.756495	1.27308	1.08433	0.834044	1.40973
4.64066	0.981498	0.75734	1.272	1.08427	0.83482	1.40826
4.62697	0.981546	0.757643	1.27162	1.08425	0.835098	1.40774
4.53388	0.981874	0.759725	1.26898	1.0841	0.837005	1.40414
5.79877	0.977997	0.734427	1.30235	1.08568	0.813348	1.44919
4.63792	0.981508	0.7574	1.27193	1.08427	0.834876	1.40816
6.10541	0.977207	0.729121	1.3097	1.08596	0.808282	1.45903
4.67077	0.981394	0.756676	1.27285	1.08432	0.83421	1.40941
4.61875	0.981574	0.757825	1.27139	1.08424	0.835265	1.40742
4.65161	0.98146	0.757098	1.27231	1.08429	0.834598	1.40868
4.60233	0.981632	0.75819	1.27092	1.08421	0.8356	1.40679
5.56331	0.978634	0.73868	1.29654	1.08545	0.817395	1.4414
6.31622	0.976686	0.725615	1.31463	1.08615	0.804925	1.46562
4.62971	0.981536	0.757582	1.2717	1.08425	0.835043	1.40784
4.58042	0.981709	0.758679	1.2703	1.08418	0.836048	1.40595
0.0574949	1.03154	0.706506	1.50611	1.07534	0.731915	1.57992
4.62971	0.981536	0.757582	1.2717	1.08425	0.835043	1.40784
5.54962	0.978672	0.738933	1.29619	1.08543	0.817635	1.44094
4.62971	0.981536	0.757582	1.2717	1.08425	0.835043	1.40784
4.62971	0.981536	0.757582	1.2717	1.08425	0.835043	1.40784
4.64339	0.981489	0.757279	1.27208	1.08428	0.834765	1.40837
4.74196	0.981151	0.755122	1.27484	1.08443	0.83278	1.41212
4.73374	0.981178	0.7553	1.27461	1.08441	0.832944	1.41181
4.73374	0.981178	0.7553	1.27461	1.08441	0.832944	1.41181
4.72553	0.981206	0.755478	1.27438	1.0844	0.833109	1.4115
4.72005	0.981225	0.755598	1.27423	1.08439	0.833218	1.41129
5.89185	0.977753	0.73279	1.3046	1.08576	0.811786	1.45221
4.74743	0.981132	0.755003	1.27499	1.08444	0.83267	1.41232
4.65982	0.981432	0.756917	1.27254	1.0843	0.834432	1.409
4.72279	0.981216	0.755538	1.2743	1.0844	0.833163	1.41139
4.72553	0.981206	0.755478	1.27438	1.0844	0.833109	1.4115
4.72827	0.981197	0.755419	1.27446	1.08441	0.833054	1.4116
4.7091	0.981262	0.755836	1.27392	1.08438	0.833438	1.41087
4.7091	0.981262	0.755836	1.27392	1.08438	0.833438	1.41087
4.74196	0.981151	0.755122	1.27484	1.08443	0.83278	1.41212
4.67899	0.981366	0.756495	1.27308	1.08433	0.834044	1.40973
4.73374	0.981178	0.7553	1.27461	1.08441	0.832944	1.41181
4.64066	0.981498	0.75734	1.272	1.08427	0.83482	1.40826
4.6653	0.981413	0.756796	1.2727	1.08431	0.834321	1.40921
4.66804	0.981403	0.756736	1.27277	1.08431	0.834266	1.40931
4.6653	0.981413	0.756796	1.2727	1.08431	0.834321	1.40921
4.68172	0.981356	0.756435	1.27316	1.08434	0.833989	1.40983
4.6078	0.981613	0.758068	1.27108	1.08422	0.835489	1.407
3.95346	0.984122	0.773579	1.25197	1.083	0.849478	1.38073
4.61054	0.981603	0.758008	1.27115	1.08422	0.835433	1.40711
4.68446	0.981347	0.756375	1.27323	1.08434	0.833934	1.40994
4.53388	0.981874	0.759725	1.26898	1.0841	0.837005	1.40414
4.67625	0.981375	0.756555	1.273	1.08433	0.8341	1.40962
4.55031	0.981816	0.759355	1.26945	1.08413	0.836667	1.40478
4.66804	0.981403	0.756736	1.27277	1.08431	0.834266	1.40931
4.61054	0.981603	0.758008	1.27115	1.08422	0.835433	1.40711
4.61054	0.981603	0.758008	1.27115	1.08422	0.835433	1.40711
4.69815	0.9813	0.756075	1.27362	1.08436	0.833658	1.41046
4.04654	0.983737	0.771256	1.25476	1.0832	0.847413	1.38459
4.68446	0.981347	0.756375	1.27323	1.08434	0.833934	1.40994
0.481862	1.02003	0.786511	1.32288	1.06456	0.819001	1.38373
4.73922	0.98116	0.755181	1.27476	1.08442	0.832835	1.41201
5.60712	0.978513	0.737876	1.29763	1.08549	0.816631	1.44287
4.72553	0.981206	0.755478	1.27438	1.0844	0.833109	1.4115
4.72553	0.981206	0.755478	1.27438	1.0844	0.833109	1.4115
6.32717	0.97666	0.725436	1.31488	1.08616	0.804753	1.46596
4.56947	0.981748	0.758925	1.26999	1.08416	0.836273	1.40552
4.66256	0.981422	0.756856	1.27262	1.08431	0.834376	1.4091
4.70089	0.98129	0.756016	1.27369	1.08437	0.833603	1.41056
4.71458	0.981244	0.755717	1.27407	1.08439	0.833328	1.41108
4.71732	0.981234	0.755657	1.27415	1.08439	0.833273	1.41118
4.71458	0.981244	0.755717	1.27407	1.08439	0.833328	1.41108
4.72005	0.981225	0.755598	1.27423	1.08439	0.833218	1.41129
4.71458	0.981244	0.755717	1.27407	1.08439	0.833328	1.41108
4.71458	0.981244	0.755717	1.27407	1.08439	0.833328	1.41108
4.72553	0.981206	0.755478	1.27438	1.0844	0.833109	1.4115
4.54757	0.981826	0.759417	1.26937	1.08412	0.836723	1.40467
4.73374	0.981178	0.7553	1.27461	1.08441	0.832944	1.41181
4.72553	0.981206	0.755478	1.27438	1.0844	0.833109	1.4115
4.67625	0.981375	0.756555	1.273	1.08433	0.8341	1.40962
4.70363	0.981281	0.755956	1.27377	1.08437	0.833548	1.41066
4.5859	0.98169	0.758557	1.27046	1.08419	0.835936	1.40616
4.61875	0.981574	0.757825	1.27139	1.08424	0.835265	1.40742
4.65161	0.98146	0.757098	1.27231	1.08429	0.834598	1.40868
4.65708	0.981441	0.756977	1.27247	1.0843	0.834487	1.40889
4.62697	0.981546	0.757643	1.27162	1.08425	0.835098	1.40774
4.61875	0.981574	0.757825	1.27139	1.08424	0.835265	1.40742
4.61875	0.981574	0.757825	1.27139	1.08424	0.835265	1.40742
4.62149	0.981565	0.757764	1.27146	1.08424	0.83521	1.40753
4.58316	0.981699	0.758618	1.27038	1.08418	0.835992	1.40605
4.564	0.981767	0.759047	1.26984	1.08415	0.836385	1.40531
4.61328	0.981594	0.757947	1.27123	1.08423	0.835377	1.40721
4.61875	0.981574	0.757825	1.27139	1.08424	0.835265	1.40742
4.64887	0.98147	0.757158	1.27223	1.08428	0.834654	1.40858
4.65161	0.98146	0.757098	1.27231	1.08429	0.834598	1.40868
4.62697	0.981546	0.757643	1.27162	1.08425	0.835098	1.40774
4.58316	0.981699	0.758618	1.27038	1.08418	0.835992	1.40605
4.55031	0.981816	0.759355	1.26945	1.08413	0.836667	1.40478
4.64887	0.98147	0.757158	1.27223	1.08428	0.834654	1.40858
4.62971	0.981536	0.757582	1.2717	1.08425	0.835043	1.40784
4.54757	0.981826	0.759417	1.26937	1.08412	0.836723	1.40467
4.55852	0.981787	0.75917	1.26968	1.08414	0.836498	1.4051
5.50856	0.978787	0.739696	1.29516	1.08539	0.818359	1.43955
4.62697	0.981546	0.757643	1.27162	1.08425	0.835098	1.40774
3.9781	0.984019	0.77296	1.25271	1.08306	0.848929	1.38175
5.88638	0.977767	0.732885	1.30447	1.08576	0.811877	1.45203
1.94114	0.997254	0.829666	1.19869	1.07491	0.892024	1.29529
4.45722	0.982151	0.761469	1.26679	1.08397	0.838596	1.40115
5.99042	0.977498	0.731082	1.30697	1.08585	0.810155	1.45538
4.09309	0.983548	0.770108	1.25614	1.0833	0.84639	1.38651
5.79329	0.978012	0.734524	1.30221	1.08567	0.81344	1.44901
4.58864	0.98168	0.758496	1.27054	1.08419	0.83588	1.40626
4.60507	0.981622	0.758129	1.271	1.08422	0.835545	1.4069
4.60233	0.981632	0.75819	1.27092	1.08421	0.8356	1.40679
6.29158	0.976746	0.726019	1.31406	1.08612	0.805312	1.46486
4.59685	0.981651	0.758312	1.27077	1.0842	0.835712	1.40658
4.61602	0.981584	0.757886	1.27131	1.08423	0.835321	1.40732
4.62149	0.981565	0.757764	1.27146	1.08424	0.83521	1.40753
4.62971	0.981536	0.757582	1.2717	1.08425	0.835043	1.40784
4.55305	0.981806	0.759294	1.26953	1.08413	0.83661	1.40489
4.60507	0.981622	0.758129	1.271	1.08422	0.835545	1.4069
4.70089	0.98129	0.756016	1.27369	1.08437	0.833603	1.41056
4.71184	0.981253	0.755777	1.274	1.08438	0.833383	1.41098
4.72279	0.981216	0.755538	1.2743	1.0844	0.833163	1.41139
4.70089	0.98129	0.756016	1.27369	1.08437	0.833603	1.41056
4.60233	0.981632	0.75819	1.27092	1.08421	0.8356	1.40679
4.62697	0.981546	0.757643	1.27162	1.08425	0.835098	1.40774
4.61328	0.981594	0.757947	1.27123	1.08423	0.835377	1.40721
4.56126	0.981777	0.759109	1.26976	1.08415	0.836442	1.4052
4.67625	0.981375	0.756555	1.273	1.08433	0.8341	1.40962
4.71458	0.981244	0.755717	1.27407	1.08439	0.833328	1.41108
4.62697	0.981546	0.757643	1.27162	1.08425	0.835098	1.40774
4.60233	0.981632	0.75819	1.27092	1.08421	0.8356	1.40679
4.6078	0.981613	0.758068	1.27108	1.08422	0.835489	1.407
4.64066	0.981498	0.75734	1.272	1.08427	0.83482	1.40826
4.73374	0.981178	0.7553	1.27461	1.08441	0.832944	1.41181
4.56126	0.981777	0.759109	1.26976	1.08415	0.836442	1.4052
4.60507	0.981622	0.758129	1.271	1.08422	0.835545	1.4069
4.01369	0.983872	0.772071	1.25377	1.08313	0.848139	1.38323
4.564	0.981767	0.759047	1.26984	1.08415	0.836385	1.40531
4.61054	0.981603	0.758008	1.27115	1.08422	0.835433	1.40711
4.58864	0.98168	0.758496	1.27054	1.08419	0.83588	1.40626
4.62971	0.981536	0.757582	1.2717	1.08425	0.835043	1.40784
4.30116	0.982733	0.765099	1.26227	1.0837	0.841888	1.39496
4.61602	0.981584	0.757886	1.27131	1.08423	0.835321	1.40732
4.62697	0.981546	0.757643	1.27162	1.08425	0.835098	1.40774
4.62971	0.981536	0.757582	1.2717	1.08425	0.835043	1.40784
4.57495	0.981728	0.758802	1.27015	1.08417	0.836161	1.40573
4.62149	0.981565	0.757764	1.27146	1.08424	0.83521	1.40753
0.0136893	1.02575	0.634966	1.65703	1.09873	0.681358	1.77176
4.65708	0.981441	0.756977	1.27247	1.0843	0.834487	1.40889
4.55031	0.981816	0.759355	1.26945	1.08413	0.836667	1.40478
4.59138	0.981671	0.758435	1.27061	1.08419	0.835824	1.40637
6.32444	0.976666	0.725481	1.31482	1.08615	0.804796	1.46587
6.31348	0.976693	0.72566	1.31457	1.08614	0.804968	1.46554
4.72005	0.981225	0.755598	1.27423	1.08439	0.833218	1.41129
4.70089	0.98129	0.756016	1.27369	1.08437	0.833603	1.41056
4.70637	0.981272	0.755896	1.27384	1.08437	0.833493	1.41077
4.69815	0.9813	0.756075	1.27362	1.08436	0.833658	1.41046
4.56947	0.981748	0.758925	1.26999	1.08416	0.836273	1.40552
4.70363	0.981281	0.755956	1.27377	1.08437	0.833548	1.41066
4.69815	0.9813	0.756075	1.27362	1.08436	0.833658	1.41046
4.60233	0.981632	0.75819	1.27092	1.08421	0.8356	1.40679
4.6872	0.981337	0.756315	1.27331	1.08434	0.833879	1.41004
4.7091	0.981262	0.755836	1.27392	1.08438	0.833438	1.41087
4.70363	0.981281	0.755956	1.27377	1.08437	0.833548	1.41066
4.62423	0.981555	0.757703	1.27154	1.08425	0.835154	1.40763
4.70637	0.981272	0.755896	1.27384	1.08437	0.833493	1.41077
4.59959	0.981642	0.758251	1.27085	1.08421	0.835656	1.40668
4.59959	0.981642	0.758251	1.27085	1.08421	0.835656	1.40668
4.61328	0.981594	0.757947	1.27123	1.08423	0.835377	1.40721
4.60233	0.981632	0.75819	1.27092	1.08421	0.8356	1.40679
4.59138	0.981671	0.758435	1.27061	1.08419	0.835824	1.40637
4.62697	0.981546	0.757643	1.27162	1.08425	0.835098	1.40774
4.61602	0.981584	0.757886	1.27131	1.08423	0.835321	1.40732
4.564	0.981767	0.759047	1.26984	1.08415	0.836385	1.40531
4.64887	0.98147	0.757158	1.27223	1.08428	0.834654	1.40858
4.60507	0.981622	0.758129	1.271	1.08422	0.835545	1.4069
4.61328	0.981594	0.757947	1.27123	1.08423	0.835377	1.40721
4.6078	0.981613	0.758068	1.27108	1.08422	0.835489	1.407
4.57221	0.981738	0.758863	1.27007	1.08416	0.836217	1.40563
4.55578	0.981796	0.759232	1.2696	1.08414	0.836554	1.40499
4.61054	0.981603	0.758008	1.27115	1.08422	0.835433	1.40711
4.62697	0.981546	0.757643	1.27162	1.08425	0.835098	1.40774
4.60233	0.981632	0.75819	1.27092	1.08421	0.8356	1.40679
4.56674	0.981758	0.758986	1.26992	1.08415	0.836329	1.40542
4.60507	0.981622	0.758129	1.271	1.08422	0.835545	1.4069
4.58864	0.98168	0.758496	1.27054	1.08419	0.83588	1.40626
4.60507	0.981622	0.758129	1.271	1.08422	0.835545	1.4069
4.6078	0.981613	0.758068	1.27108	1.08422	0.835489	1.407
4.60507	0.981622	0.758129	1.271	1.08422	0.835545	1.4069
4.59138	0.981671	0.758435	1.27061	1.08419	0.835824	1.40637
4.60507	0.981622	0.758129	1.271	1.08422	0.835545	1.4069
4.58042	0.981709	0.758679	1.2703	1.08418	0.836048	1.40595
4.61054	0.981603	0.758008	1.27115	1.08422	0.835433	1.40711
4.69541	0.981309	0.756135	1.27354	1.08436	0.833713	1.41035
4.71732	0.981234	0.755657	1.27415	1.08439	0.833273	1.41118
4.61054	0.981603	0.758008	1.27115	1.08422	0.835433	1.40711
4.73374	0.981178	0.7553	1.27461	1.08441	0.832944	1.41181
4.69815	0.9813	0.756075	1.27362	1.08436	0.833658	1.41046
4.72005	0.981225	0.755598	1.27423	1.08439	0.833218	1.41129
4.70637	0.981272	0.755896	1.27384	1.08437	0.833493	1.41077
4.68172	0.981356	0.756435	1.27316	1.08434	0.833989	1.40983
4.70363	0.981281	0.755956	1.27377	1.08437	0.833548	1.41066
4.56126	0.981777	0.759109	1.26976	1.08415	0.836442	1.4052
6.27789	0.97678	0.726245	1.31374	1.08611	0.805528	1.46443
6.12457	0.977159	0.728798	1.31016	1.08598	0.807972	1.45964
4.91444	0.980579	0.751445	1.27958	1.08467	0.829379	1.41856
4.6078	0.981613	0.758068	1.27108	1.08422	0.835489	1.407
4.59138	0.981671	0.758435	1.27061	1.08419	0.835824	1.40637
5.47296	0.978887	0.740362	1.29426	1.08535	0.818989	1.43835
5.60712	0.978513	0.737876	1.29763	1.08549	0.816631	1.44287
4.59138	0.981671	0.758435	1.27061	1.08419	0.835824	1.40637
4.59138	0.981671	0.758435	1.27061	1.08419	0.835824	1.40637
6.04791	0.977352	0.730097	1.30834	1.08591	0.809215	1.45721
5.57974	0.978589	0.738378	1.29695	1.08546	0.817108	1.44195
4.59138	0.981671	0.758435	1.27061	1.08419	0.835824	1.40637
5.81246	0.977961	0.734185	1.30268	1.08569	0.813117	1.44963
6.05886	0.977324	0.729911	1.3086	1.08592	0.809036	1.45756
6.30801	0.976706	0.72575	1.31444	1.08614	0.805054	1.46537
5.94661	0.977611	0.731838	1.30592	1.08581	0.810877	1.45397
4.63792	0.981508	0.7574	1.27193	1.08427	0.834876	1.40816
4.58316	0.981699	0.758618	1.27038	1.08418	0.835992	1.40605
4.59959	0.981642	0.758251	1.27085	1.08421	0.835656	1.40668
4.6078	0.981613	0.758068	1.27108	1.08422	0.835489	1.407
4.63244	0.981527	0.757521	1.27177	1.08426	0.834987	1.40795
4.62149	0.981565	0.757764	1.27146	1.08424	0.83521	1.40753
4.65161	0.98146	0.757098	1.27231	1.08429	0.834598	1.40868
4.64613	0.981479	0.757219	1.27216	1.08428	0.834709	1.40847
4.63792	0.981508	0.7574	1.27193	1.08427	0.834876	1.40816
4.62149	0.981565	0.757764	1.27146	1.08424	0.83521	1.40753
4.58864	0.98168	0.758496	1.27054	1.08419	0.83588	1.40626
4.62697	0.981546	0.757643	1.27162	1.08425	0.835098	1.40774
4.64887	0.98147	0.757158	1.27223	1.08428	0.834654	1.40858
4.64887	0.98147	0.757158	1.27223	1.08428	0.834654	1.40858
4.62423	0.981555	0.757703	1.27154	1.08425	0.835154	1.40763
4.64887	0.98147	0.757158	1.27223	1.08428	0.834654	1.40858
4.62971	0.981536	0.757582	1.2717	1.08425	0.835043	1.40784
4.62971	0.981536	0.757582	1.2717	1.08425	0.835043	1.40784
4.62149	0.981565	0.757764	1.27146	1.08424	0.83521	1.40753
4.62423	0.981555	0.757703	1.27154	1.08425	0.835154	1.40763
4.62697	0.981546	0.757643	1.27162	1.08425	0.835098	1.40774
4.62423	0.981555	0.757703	1.27154	1.08425	0.835154	1.40763
4.65982	0.981432	0.756917	1.27254	1.0843	0.834432	1.409
4.64887	0.98147	0.757158	1.27223	1.08428	0.834654	1.40858
4.63244	0.981527	0.757521	1.27177	1.08426	0.834987	1.40795
4.564	0.981767	0.759047	1.26984	1.08415	0.836385	1.40531
4.53936	0.981855	0.759602	1.26914	1.08411	0.836892	1.40435
4.62971	0.981536	0.757582	1.2717	1.08425	0.835043	1.40784
4.62971	0.981536	0.757582	1.2717	1.08425	0.835043	1.40784
4.62149	0.981565	0.757764	1.27146	1.08424	0.83521	1.40753
4.61875	0.981574	0.757825	1.27139	1.08424	0.835265	1.40742
4.62697	0.981546	0.757643	1.27162	1.08425	0.835098	1.40774
6.15469	0.977083	0.728292	1.31086	1.086	0.807488	1.46058
4.62697	0.981546	0.757643	1.27162	1.08425	0.835098	1.40774
4.64339	0.981489	0.757279	1.27208	1.08428	0.834765	1.40837
4.63244	0.981527	0.757521	1.27177	1.08426	0.834987	1.40795
4.5859	0.98169	0.758557	1.27046	1.08419	0.835936	1.40616
4.54757	0.981826	0.759417	1.26937	1.08412	0.836723	1.40467
4.62149	0.981565	0.757764	1.27146	1.08424	0.83521	1.40753
5.92197	0.977675	0.732265	1.30533	1.08579	0.811285	1.45318
4.53388	0.981874	0.759725	1.26898	1.0841	0.837005	1.40414
6.06708	0.977303	0.729771	1.3088	1.08592	0.808903	1.45782
5.90281	0.977724	0.732599	1.30487	1.08577	0.811604	1.45256
5.90281	0.977724	0.732599	1.30487	1.08577	0.811604	1.45256
6.141	0.977118	0.728522	1.31054	1.08599	0.807708	1.46015
6.00684	0.977456	0.730799	1.30736	1.08587	0.809886	1.4559
6.1191	0.977172	0.72889	1.31003	1.08597	0.808061	1.45946
5.56879	0.978619	0.738579	1.29667	1.08545	0.8173	1.44158
6.13826	0.977124	0.728568	1.31048	1.08599	0.807752	1.46007
5.59617	0.978544	0.738076	1.29736	1.08548	0.816822	1.4425
5.41273	0.979059	0.741499	1.29273	1.08529	0.820065	1.43629
5.96578	0.977562	0.731506	1.30638	1.08583	0.810561	1.45459
5.85079	0.97786	0.733509	1.30361	1.08572	0.812473	1.45088
6.13552	0.977131	0.728614	1.31041	1.08599	0.807796	1.45998
4.59959	0.981642	0.758251	1.27085	1.08421	0.835656	1.40668
4.62149	0.981565	0.757764	1.27146	1.08424	0.83521	1.40753
4.58864	0.98168	0.758496	1.27054	1.08419	0.83588	1.40626
4.56947	0.981748	0.758925	1.26999	1.08416	0.836273	1.40552
5.24298	0.979556	0.744779	1.28834	1.0851	0.823154	1.43039
5.88638	0.977767	0.732885	1.30447	1.08576	0.811877	1.45203
4.62149	0.981565	0.757764	1.27146	1.08424	0.83521	1.40753
4.61054	0.981603	0.758008	1.27115	1.08422	0.835433	1.40711
4.58864	0.98168	0.758496	1.27054	1.08419	0.83588	1.40626
4.62971	0.981536	0.757582	1.2717	1.08425	0.835043	1.40784
5.92745	0.977661	0.73217	1.30546	1.0858	0.811194	1.45336
4.61602	0.981584	0.757886	1.27131	1.08423	0.835321	1.40732
4.59959	0.981642	0.758251	1.27085	1.08421	0.835656	1.40668
4.59138	0.981671	0.758435	1.27061	1.08419	0.835824	1.40637
5.28131	0.979442	0.744029	1.28934	1.08514	0.822449	1.43174
4.4846	0.982052	0.760843	1.26757	1.08402	0.838025	1.40222
4.62149	0.981565	0.757764	1.27146	1.08424	0.83521	1.40753
4.59959	0.981642	0.758251	1.27085	1.08421	0.835656	1.40668
4.58042	0.981709	0.758679	1.2703	1.08418	0.836048	1.40595
4.58864	0.98168	0.758496	1.27054	1.08419	0.83588	1.40626
4.60233	0.981632	0.75819	1.27092	1.08421	0.8356	1.40679
4.35318	0.982536	0.763877	1.26379	1.08379	0.840782	1.39703
4.5859	0.98169	0.758557	1.27046	1.08419	0.835936	1.40616
4.6078	0.981613	0.758068	1.27108	1.08422	0.835489	1.407
4.59138	0.981671	0.758435	1.27061	1.08419	0.835824	1.40637
6.141	0.977118	0.728522	1.31054	1.08599	0.807708	1.46015
5.79329	0.978012	0.734524	1.30221	1.08567	0.81344	1.44901
4.6078	0.981613	0.758068	1.27108	1.08422	0.835489	1.407
5.84805	0.977867	0.733557	1.30354	1.08572	0.812518	1.45079
6.10541	0.977207	0.729121	1.3097	1.08596	0.808282	1.45903
5.87269	0.977803	0.733125	1.30414	1.08575	0.812106	1.45159
5.88912	0.97776	0.732838	1.30454	1.08576	0.811832	1.45212
5.79603	0.978005	0.734476	1.30228	1.08567	0.813394	1.4491
5.93292	0.977646	0.732075	1.30559	1.0858	0.811104	1.45353
4.31759	0.98267	0.764712	1.26275	1.08373	0.841538	1.39561
4.54483	0.981835	0.759478	1.26929	1.08412	0.836779	1.40457
4.51198	0.981953	0.760221	1.26836	1.08406	0.837458	1.40329
6.09993	0.977221	0.729214	1.30957	1.08595	0.80837	1.45886
6.1191	0.977172	0.72889	1.31003	1.08597	0.808061	1.45946
4.56674	0.981758	0.758986	1.26992	1.08415	0.836329	1.40542
4.53388	0.981874	0.759725	1.26898	1.0841	0.837005	1.40414
4.54483	0.981835	0.759478	1.26929	1.08412	0.836779	1.40457
4.54483	0.981835	0.759478	1.26929	1.08412	0.836779	1.40457
5.86721	0.977817	0.733221	1.30401	1.08574	0.812197	1.45141
5.40999	0.979067	0.741551	1.29266	1.08529	0.820114	1.4362
4.57495	0.981728	0.758802	1.27015	1.08417	0.836161	1.40573
4.54209	0.981845	0.75954	1.26922	1.08411	0.836836	1.40446
4.53662	0.981865	0.759664	1.26906	1.08411	0.836949	1.40425
5.64271	0.978416	0.737227	1.29851	1.08553	0.816014	1.44405
4.53388	0.981874	0.759725	1.26898	1.0841	0.837005	1.40414
4.47639	0.982082	0.761031	1.26734	1.084	0.838196	1.4019
5.3525	0.979233	0.742651	1.29118	1.08522	0.821151	1.43421
4.53388	0.981874	0.759725	1.26898	1.0841	0.837005	1.40414
4.51198	0.981953	0.760221	1.26836	1.08406	0.837458	1.40329
6.10267	0.977214	0.729168	1.30964	1.08596	0.808326	1.45894
5.36619	0.979193	0.742388	1.29154	1.08524	0.820903	1.43469
4.53114	0.981884	0.759787	1.2689	1.0841	0.837062	1.40404
6.15469	0.977083	0.728292	1.31086	1.086	0.807488	1.46058
6.08624	0.977255	0.729446	1.30925	1.08594	0.808592	1.45843
4.53388	0.981874	0.759725	1.26898	1.0841	0.837005	1.40414
4.00548	0.983906	0.772276	1.25353	1.08311	0.848321	1.38289
6.15195	0.97709	0.728338	1.3108	1.086	0.807532	1.4605
6.15195	0.97709	0.728338	1.3108	1.086	0.807532	1.4605
6.15195	0.97709	0.728338	1.3108	1.086	0.807532	1.4605
6.15195	0.97709	0.728338	1.3108	1.086	0.807532	1.4605
4.52841	0.981894	0.759849	1.26883	1.08409	0.837118	1.40393
4.57495	0.981728	0.758802	1.27015	1.08417	0.836161	1.40573
4.94182	0.980491	0.750873	1.28033	1.08471	0.828847	1.41956
4.55305	0.981806	0.759294	1.26953	1.08413	0.83661	1.40489
4.60233	0.981632	0.75819	1.27092	1.08421	0.8356	1.40679
4.58316	0.981699	0.758618	1.27038	1.08418	0.835992	1.40605
4.58864	0.98168	0.758496	1.27054	1.08419	0.83588	1.40626
4.61875	0.981574	0.757825	1.27139	1.08424	0.835265	1.40742
4.58864	0.98168	0.758496	1.27054	1.08419	0.83588	1.40626
4.59138	0.981671	0.758435	1.27061	1.08419	0.835824	1.40637
4.58316	0.981699	0.758618	1.27038	1.08418	0.835992	1.40605
6.11636	0.977179	0.728936	1.30996	1.08597	0.808105	1.45938
4.59685	0.981651	0.758312	1.27077	1.0842	0.835712	1.40658
4.56947	0.981748	0.758925	1.26999	1.08416	0.836273	1.40552
4.51198	0.981953	0.760221	1.26836	1.08406	0.837458	1.40329
4.58864	0.98168	0.758496	1.27054	1.08419	0.83588	1.40626
4.60507	0.981622	0.758129	1.271	1.08422	0.835545	1.4069
4.82136	0.980884	0.753414	1.27703	1.08454	0.831203	1.4151
6.12183	0.977166	0.728844	1.31009	1.08597	0.808016	1.45955
4.58316	0.981699	0.758618	1.27038	1.08418	0.835992	1.40605
4.5859	0.98169	0.758557	1.27046	1.08419	0.835936	1.40616
4.60507	0.981622	0.758129	1.271	1.08422	0.835545	1.4069
4.55305	0.981806	0.759294	1.26953	1.08413	0.83661	1.40489
4.56947	0.981748	0.758925	1.26999	1.08416	0.836273	1.40552
4.58316	0.981699	0.758618	1.27038	1.08418	0.835992	1.40605
6.1191	0.977172	0.72889	1.31003	1.08597	0.808061	1.45946
4.56947	0.981748	0.758925	1.26999	1.08416	0.836273	1.40552
5.56879	0.978619	0.738579	1.29667	1.08545	0.8173	1.44158
4.61875	0.981574	0.757825	1.27139	1.08424	0.835265	1.40742
4.53114	0.981884	0.759787	1.2689	1.0841	0.837062	1.40404
5.85352	0.977853	0.733461	1.30368	1.08573	0.812427	1.45097
5.52225	0.978749	0.739441	1.2955	1.0854	0.818117	1.44002
6.10541	0.977207	0.729121	1.3097	1.08596	0.808282	1.45903
5.70294	0.978253	0.736138	1.3	1.08558	0.814978	1.44604
6.09446	0.977234	0.729307	1.30945	1.08595	0.808459	1.45869
5.86721	0.977817	0.733221	1.30401	1.08574	0.812197	1.45141
6.06434	0.97731	0.729817	1.30873	1.08592	0.808947	1.45773
5.89459	0.977746	0.732742	1.30467	1.08577	0.81174	1.4523
5.93292	0.977646	0.732075	1.30559	1.0858	0.811104	1.45353
6.08624	0.977255	0.729446	1.30925	1.08594	0.808592	1.45843
5.90554	0.977717	0.732551	1.30493	1.08578	0.811558	1.45265
6.09993	0.977221	0.729214	1.30957	1.08595	0.80837	1.45886
6.09446	0.977234	0.729307	1.30945	1.08595	0.808459	1.45869
6.02601	0.977408	0.730471	1.30782	1.08589	0.809572	1.45651
6.09719	0.977227	0.72926	1.30951	1.08595	0.808414	1.45877
4.56126	0.981777	0.759109	1.26976	1.08415	0.836442	1.4052
4.564	0.981767	0.759047	1.26984	1.08415	0.836385	1.40531
4.52841	0.981894	0.759849	1.26883	1.08409	0.837118	1.40393
4.5065	0.981973	0.760345	1.2682	1.08406	0.837571	1.40308
4.53114	0.981884	0.759787	1.2689	1.0841	0.837062	1.40404
4.58042	0.981709	0.758679	1.2703	1.08418	0.836048	1.40595
5.51129	0.978779	0.739645	1.29523	1.08539	0.81831	1.43965
4.5065	0.981973	0.760345	1.2682	1.08406	0.837571	1.40308
4.57221	0.981738	0.758863	1.27007	1.08416	0.836217	1.40563
4.58042	0.981709	0.758679	1.2703	1.08418	0.836048	1.40595
4.5859	0.98169	0.758557	1.27046	1.08419	0.835936	1.40616
4.60233	0.981632	0.75819	1.27092	1.08421	0.8356	1.40679
4.564	0.981767	0.759047	1.26984	1.08415	0.836385	1.40531
4.56947	0.981748	0.758925	1.26999	1.08416	0.836273	1.40552
4.57221	0.981738	0.758863	1.27007	1.08416	0.836217	1.40563
4.55031	0.981816	0.759355	1.26945	1.08413	0.836667	1.40478
4.55305	0.981806	0.759294	1.26953	1.08413	0.83661	1.40489
4.59959	0.981642	0.758251	1.27085	1.08421	0.835656	1.40668
4.56126	0.981777	0.759109	1.26976	1.08415	0.836442	1.4052
4.53388	0.981874	0.759725	1.26898	1.0841	0.837005	1.40414
4.53388	0.981874	0.759725	1.26898	1.0841	0.837005	1.40414
4.54757	0.981826	0.759417	1.26937	1.08412	0.836723	1.40467
4.56674	0.981758	0.758986	1.26992	1.08415	0.836329	1.40542
4.55031	0.981816	0.759355	1.26945	1.08413	0.836667	1.40478
4.58042	0.981709	0.758679	1.2703	1.08418	0.836048	1.40595
4.564	0.981767	0.759047	1.26984	1.08415	0.836385	1.40531
4.52841	0.981894	0.759849	1.26883	1.08409	0.837118	1.40393
4.58042	0.981709	0.758679	1.2703	1.08418	0.836048	1.40595
4.54757	0.981826	0.759417	1.26937	1.08412	0.836723	1.40467
4.57495	0.981728	0.758802	1.27015	1.08417	0.836161	1.40573
4.55031	0.981816	0.759355	1.26945	1.08413	0.836667	1.40478
4.57495	0.981728	0.758802	1.27015	1.08417	0.836161	1.40573
4.59411	0.981661	0.758373	1.27069	1.0842	0.835768	1.40647
4.55031	0.981816	0.759355	1.26945	1.08413	0.836667	1.40478
4.57221	0.981738	0.758863	1.27007	1.08416	0.836217	1.40563
4.56674	0.981758	0.758986	1.26992	1.08415	0.836329	1.40542
4.55852	0.981787	0.75917	1.26968	1.08414	0.836498	1.4051
4.59959	0.981642	0.758251	1.27085	1.08421	0.835656	1.40668
4.55031	0.981816	0.759355	1.26945	1.08413	0.836667	1.40478
4.564	0.981767	0.759047	1.26984	1.08415	0.836385	1.40531
4.55031	0.981816	0.759355	1.26945	1.08413	0.836667	1.40478
4.55578	0.981796	0.759232	1.2696	1.08414	0.836554	1.40499
4.47365	0.982092	0.761093	1.26726	1.084	0.838253	1.40179
4.52841	0.981894	0.759849	1.26883	1.08409	0.837118	1.40393
4.54757	0.981826	0.759417	1.26937	1.08412	0.836723	1.40467
4.50924	0.981963	0.760283	1.26828	1.08406	0.837514	1.40318
4.53388	0.981874	0.759725	1.26898	1.0841	0.837005	1.40414
4.55031	0.981816	0.759355	1.26945	1.08413	0.836667	1.40478
4.57221	0.981738	0.758863	1.27007	1.08416	0.836217	1.40563
4.57221	0.981738	0.758863	1.27007	1.08416	0.836217	1.40563
4.54483	0.981835	0.759478	1.26929	1.08412	0.836779	1.40457
4.54483	0.981835	0.759478	1.26929	1.08412	0.836779	1.40457
3.95893	0.984099	0.773441	1.25213	1.08302	0.849356	1.38095
4.45448	0.982161	0.761532	1.26671	1.08397	0.838653	1.40104
6.02053	0.977421	0.730565	1.30769	1.08588	0.809662	1.45634
6.08624	0.977255	0.729446	1.30925	1.08594	0.808592	1.45843
6.08624	0.977255	0.729446	1.30925	1.08594	0.808592	1.45843
5.89459	0.977746	0.732742	1.30467	1.08577	0.81174	1.4523
5.87543	0.977796	0.733077	1.30421	1.08575	0.81206	1.45168
5.3744	0.97917	0.74223	1.29175	1.08525	0.820755	1.43497
5.9165	0.977689	0.73236	1.3052	1.08579	0.811376	1.453
6.08077	0.977269	0.729539	1.30912	1.08594	0.80868	1.45825
5.08693	0.980032	0.747892	1.28423	1.0849	0.82607	1.42484
6.08077	0.977269	0.729539	1.30912	1.08594	0.80868	1.45825
5.88638	0.977767	0.732885	1.30447	1.08576	0.811877	1.45203
5.96304	0.977569	0.731553	1.30632	1.08583	0.810606	1.4545
6.07803	0.977276	0.729585	1.30906	1.08593	0.808725	1.45817
5.83162	0.977911	0.733847	1.30315	1.08571	0.812794	1.45026
4.69541	0.981309	0.756135	1.27354	1.08436	0.833713	1.41035
[truncated: 44,437 more rows]
