# Supplementary material for: Sense of coherence and risk of breast cancer
Source: eLife. 2020 Nov 23;9:e61469. doi: 10.7554/eLife.61469 (PMC7717898; doi:10.7554/eLife.61469)
Supplement: Supplementary file 1. — The following questions were asked to investigate how the participants experienced these situations. A 7-point Likert-type scale is used to answer each question, with one corresponding to ‘very seldom or never’, and seven corresponding to ‘very often’. To simplify the structure, the answer of item 4 to 9, 11 to 13 have been reversed on the basis of the original SoC-13 questionnaire. [file elife-61469-supp1.pdf]

## SoC-13 questionnaire of sense of coherence used in the Karolinska Mammography

### Project for Risk Prediction of Breast Cancer (Karma) cohort

The following questions were asked to investigate how the participants experienced these situations. A 7-point Likert-type scale is used to answer each question, with 1 corresponding to “very seldom or never”, and 7 corresponding to “very often”. To simplify the structure, the answer of item 4 to 9, 11 to 13 have been reversed on the basis of the original SoC-13 questionnaire.

| Number | Question                                                                                                   | Dimension         |
|--------|------------------------------------------------------------------------------------------------------------|-------------------|
| 1      | Do you have a sense that you do not care what is going on around you?                                      | Meaningfulness    |
| 2      | Have you been surprised by the behavior of people you thought you knew?                                    | Comprehensibility |
| 3      | Has it happened that people you trusted have let you down?                                                 | Manageability     |
| 4      | Do you think your life until now have a complete lack of goals?                                            | Meaningfulness    |
| 5      | Do you feel that you are treated unfair?                                                                   | Manageability     |
| 6      | Do you have a feeling of being in an unfamiliar situation without knowing what to do?                      | Comprehensibility |
| 7      | Are your daily activities a source to great joy and satisfaction?                                          | Meaningfulness    |
| 8      | Do you have disorganized emotions, thoughts and ideas shifting from one to another?                        | Comprehensibility |
| 9      | Do you have feelings that you would rather not acknowledge?                                                | Comprehensibility |
| 10     | People, even with character, feel like sad losers in special situations. How often did you feel like this? | Manageability     |
| 11     | When something happened, how often did you over or underestimate its importance?                           | Comprehensibility |
| 12     | How often have do you feel that there is little or no meaning with your daily life?                        | Meaningfulness    |
| 13     | How often do you feel uncertain to manage to control yourself?                                             | Manageability     |
